# Supplementary material
Source: PubMed Central journal article supplement (PMC1785127)

# Supporting Information

( $^1\text{H}$  and  $^{13}\text{C}$  NMR)

## **Total Synthesis of Kendomycin: A Macro-C-glycosidation Approach**

Yu Yuan, Hongbin Men and Chulbom Lee\*

Department of Chemistry, Princeton University

Princeton, New Jersey, 08544

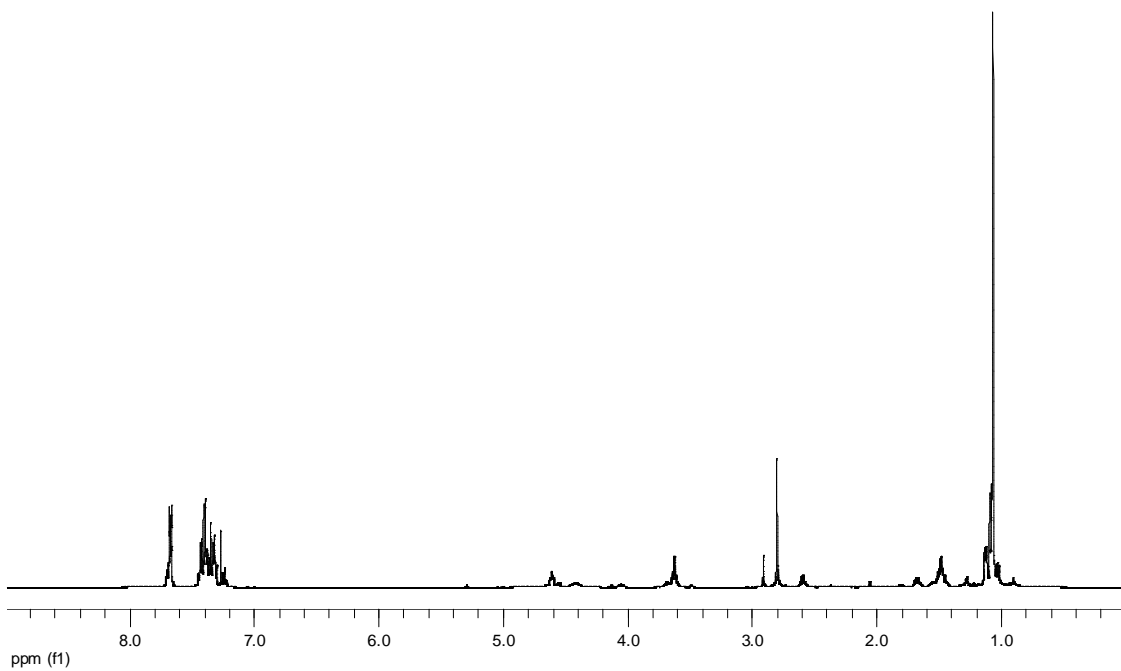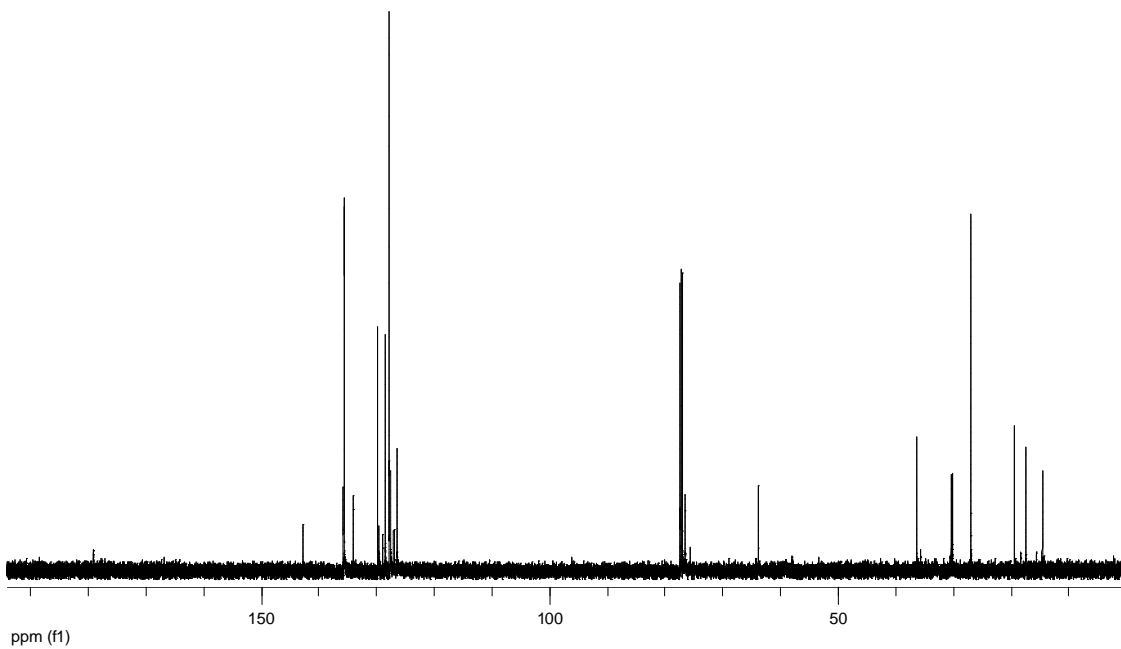

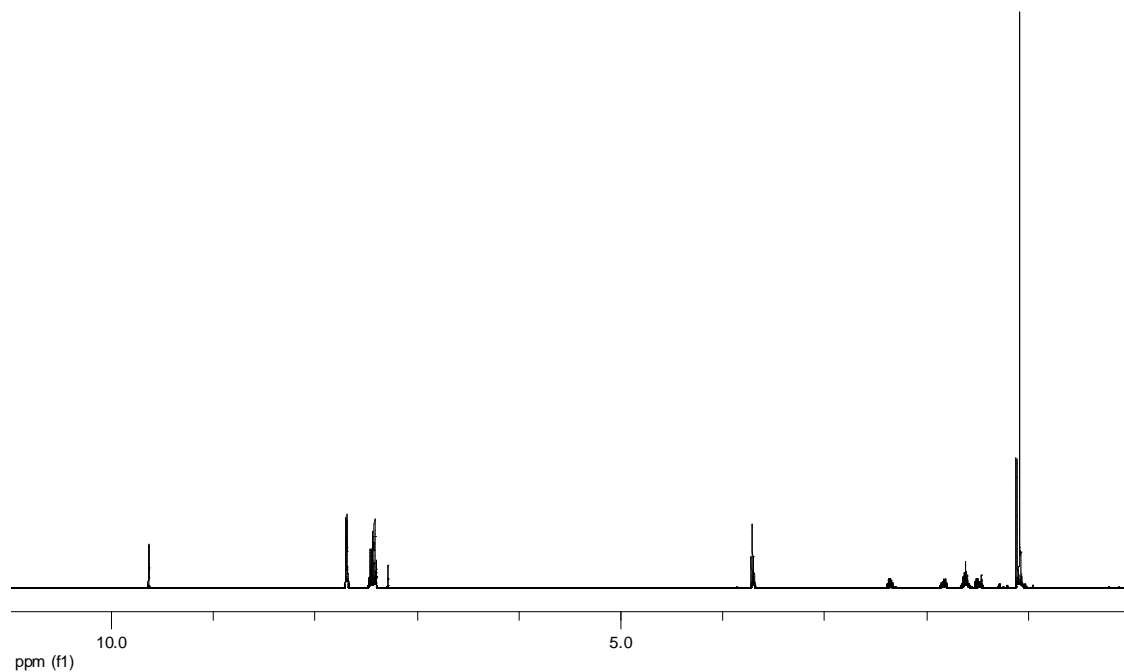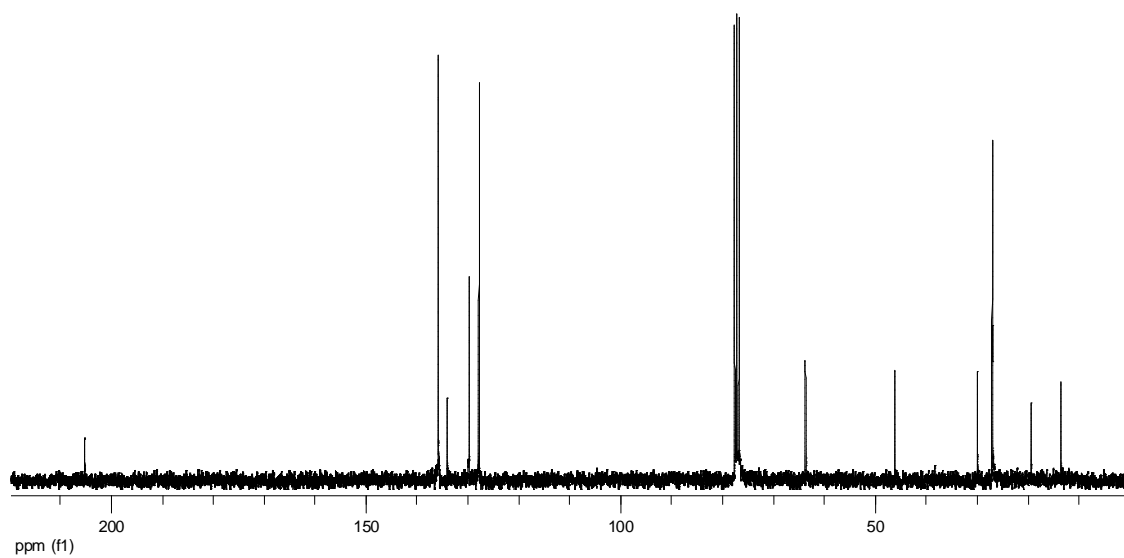

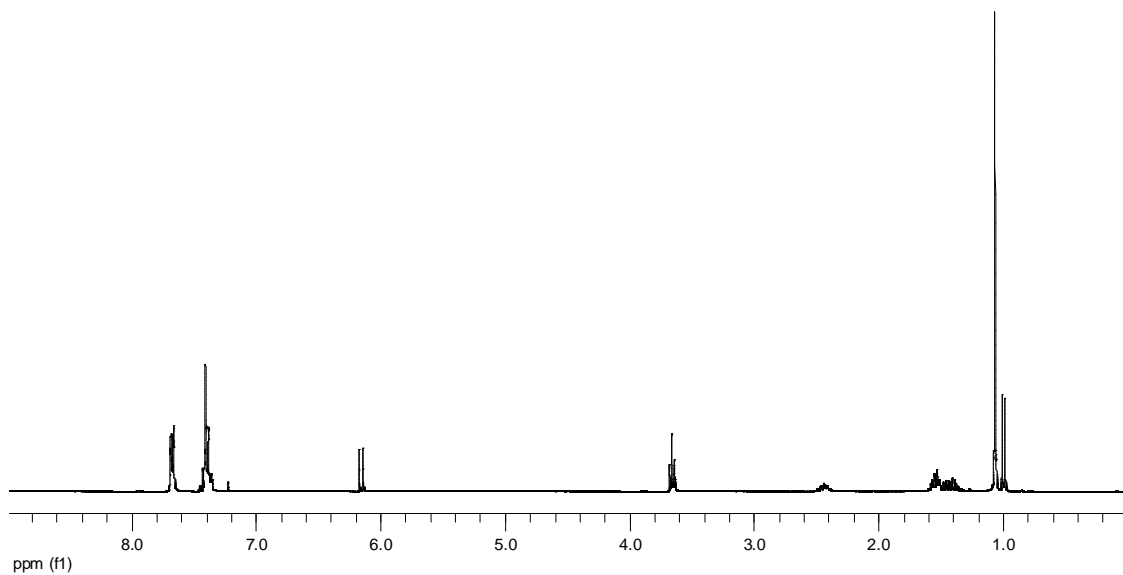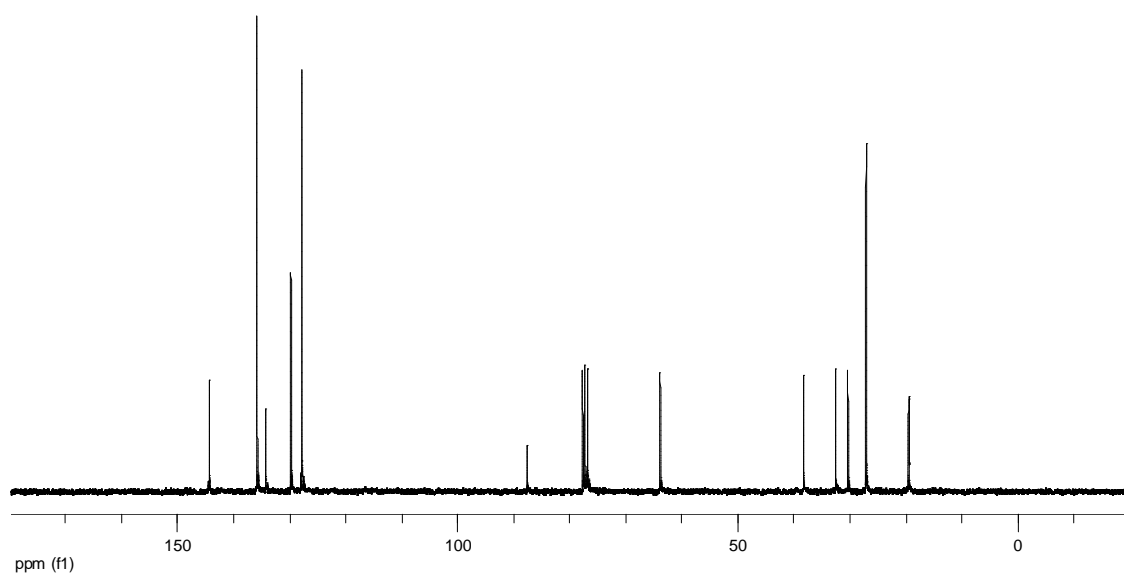

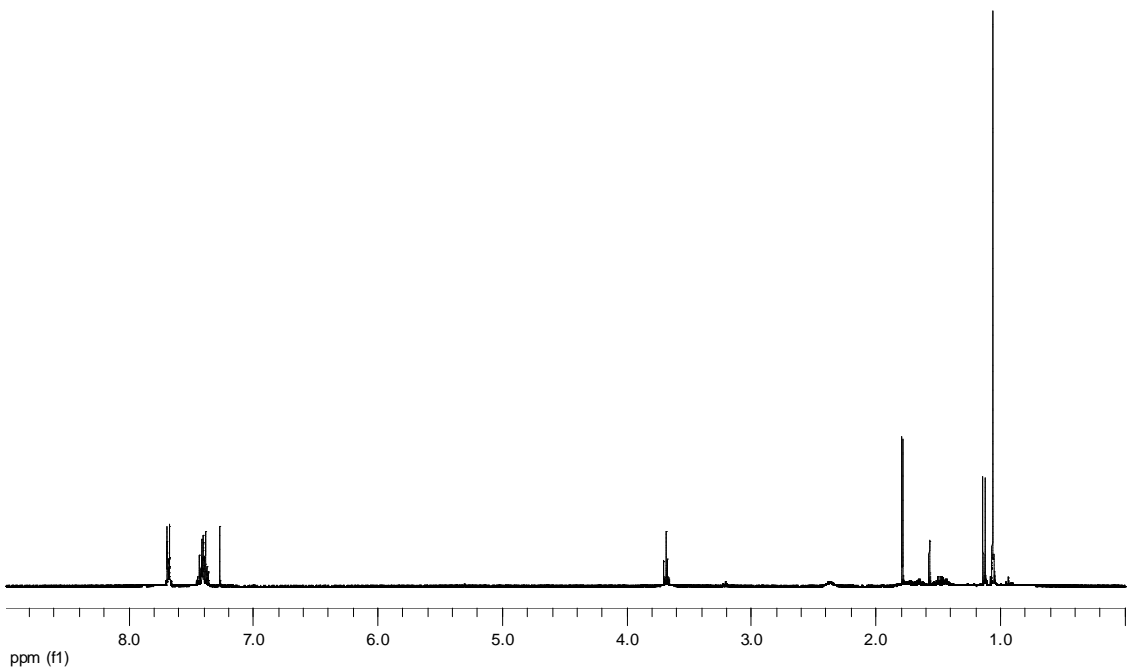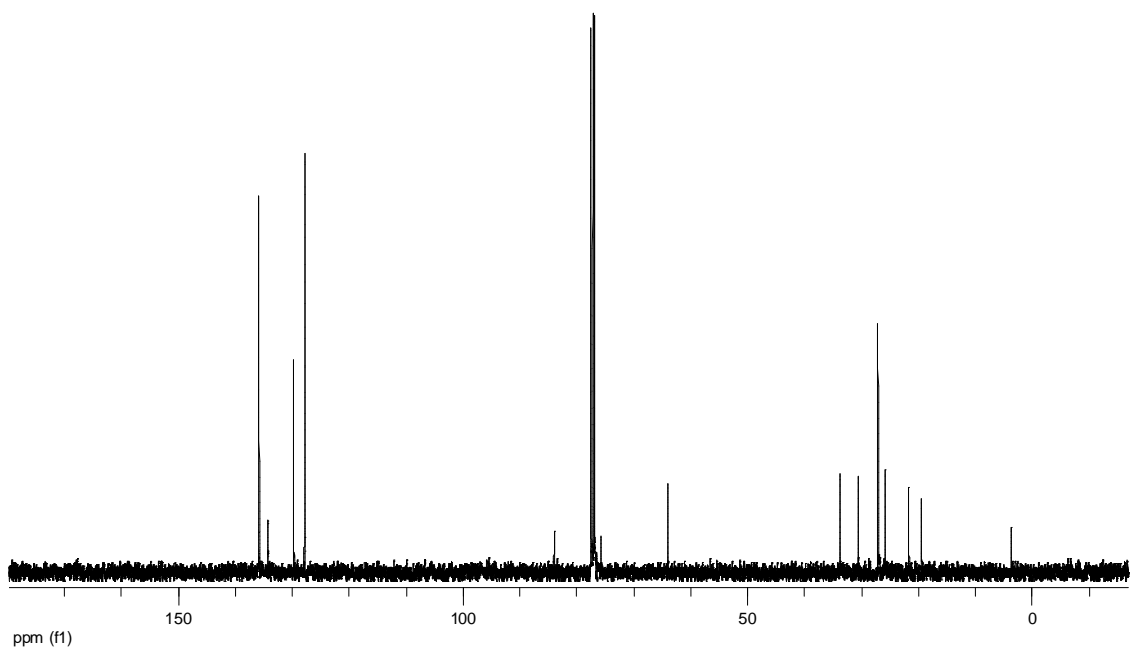

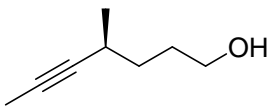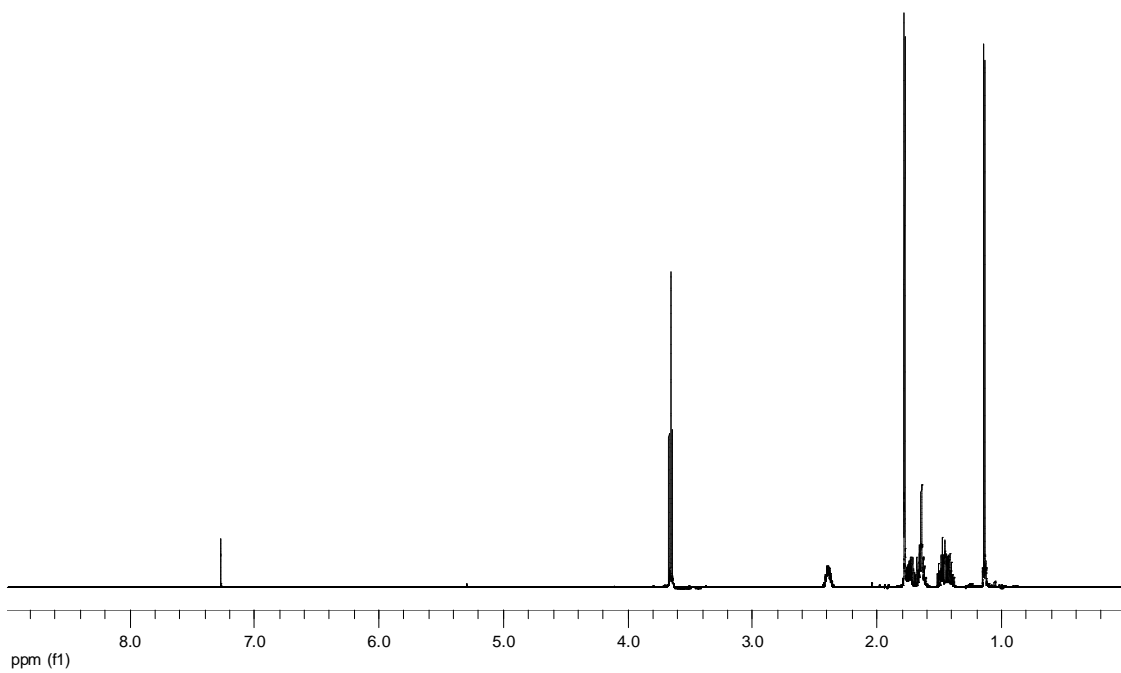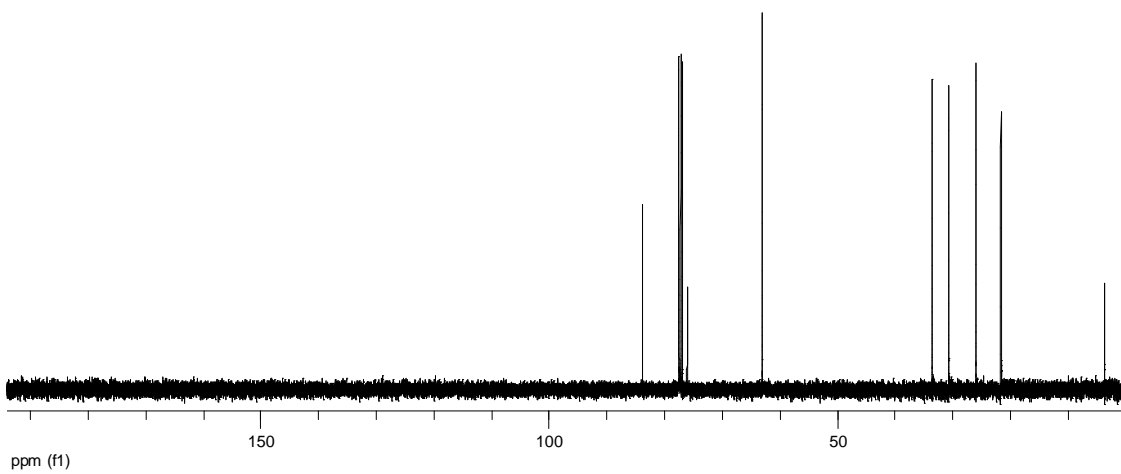

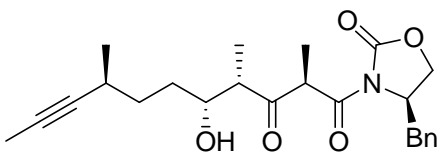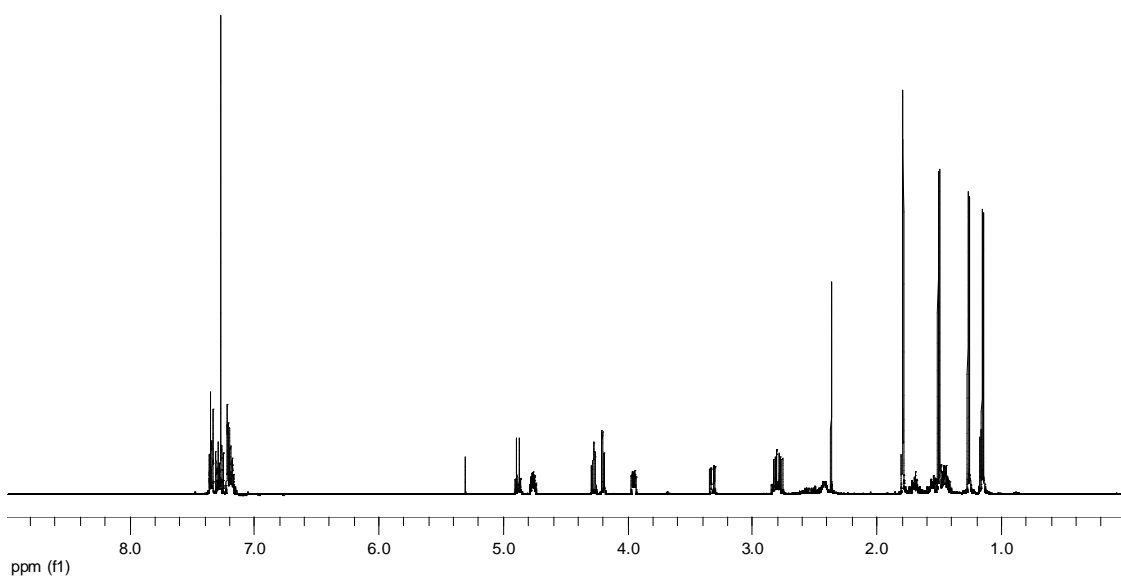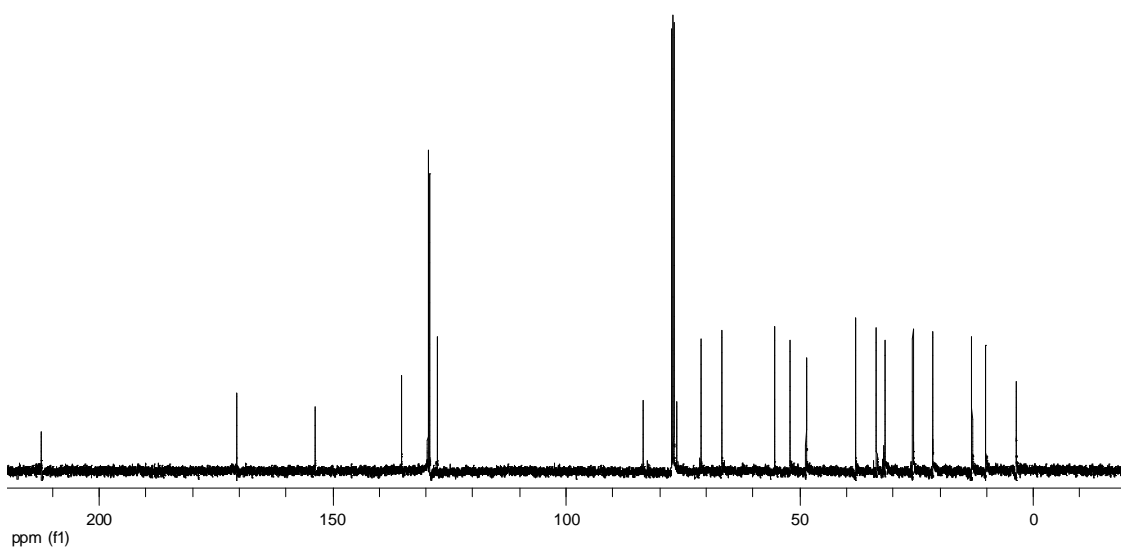

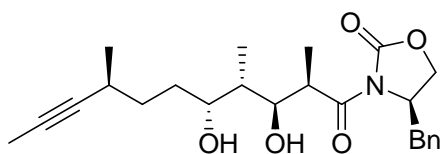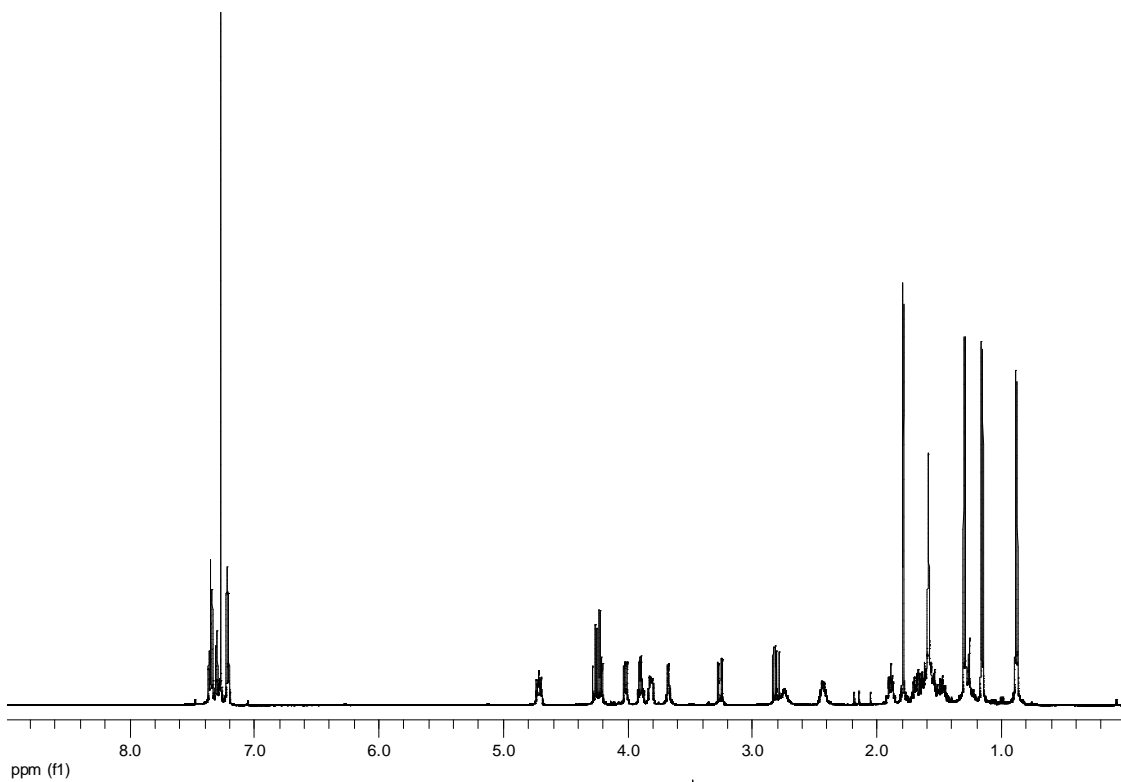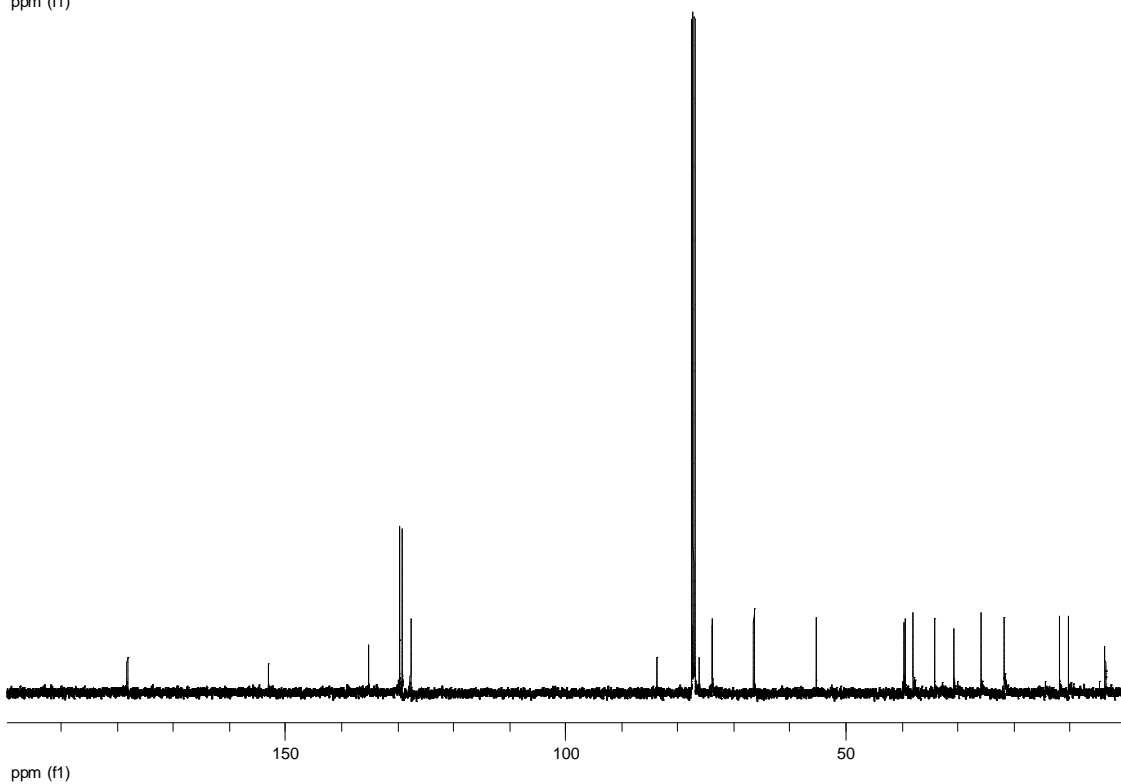

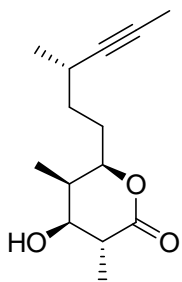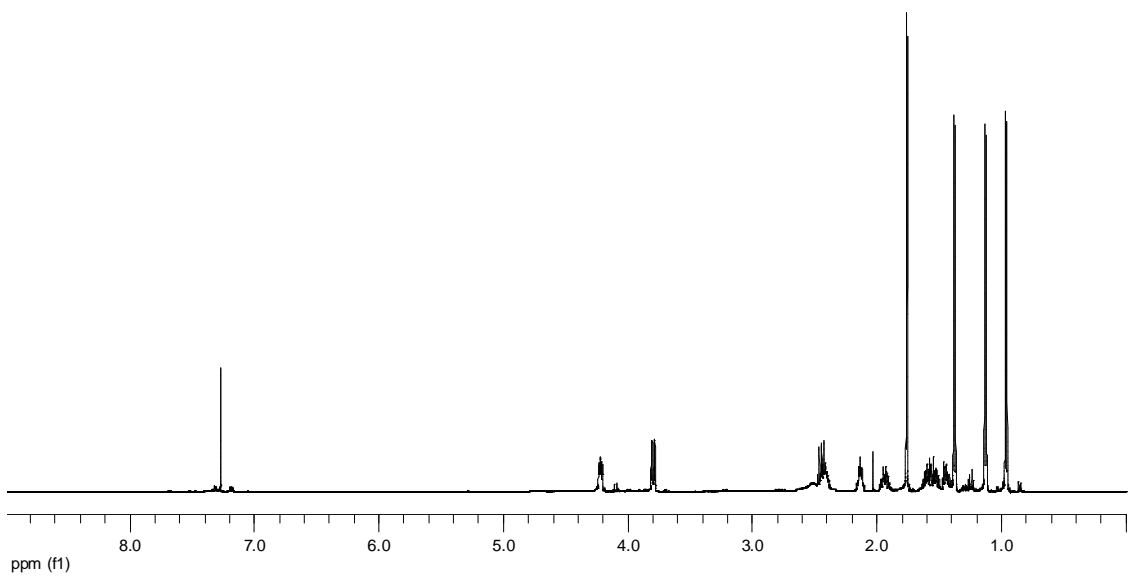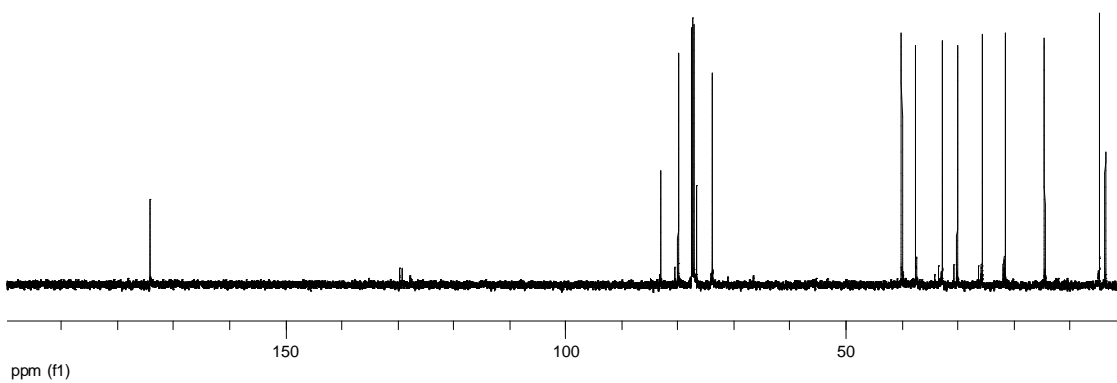

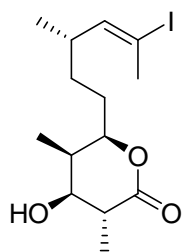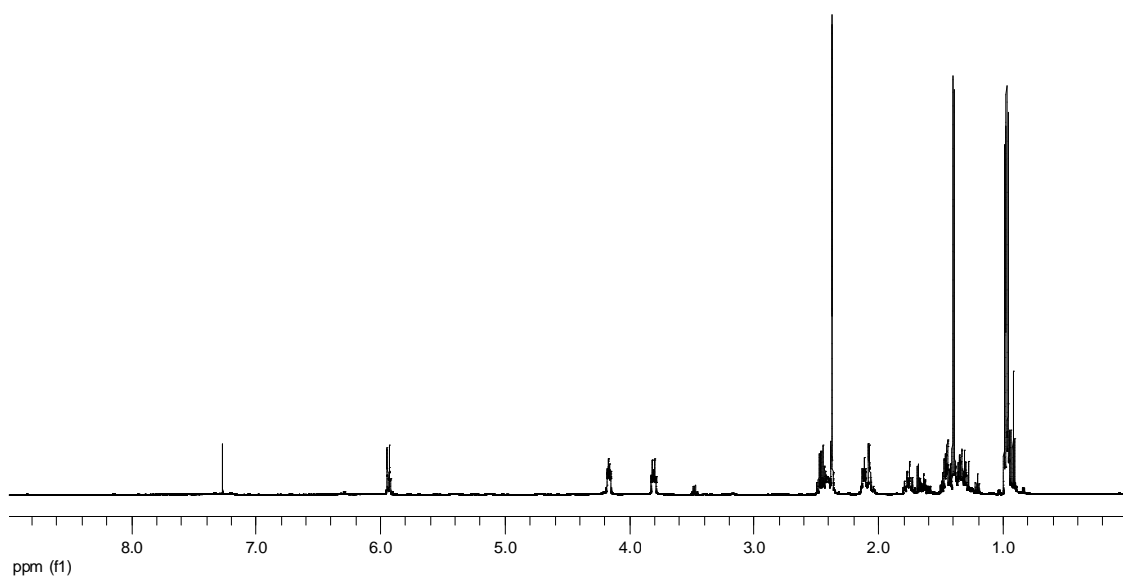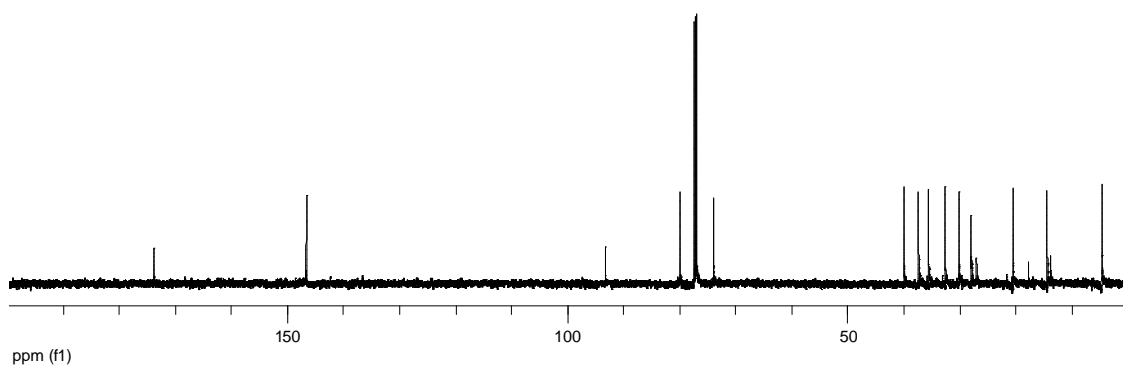

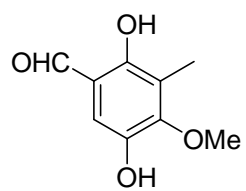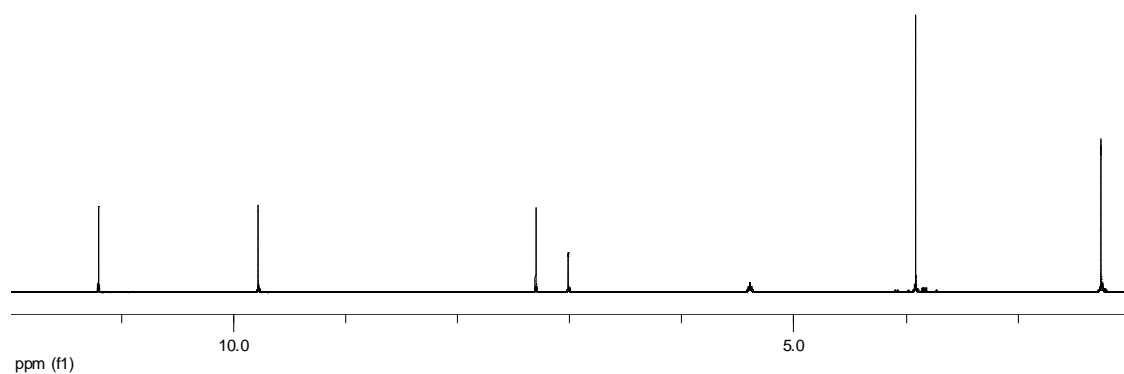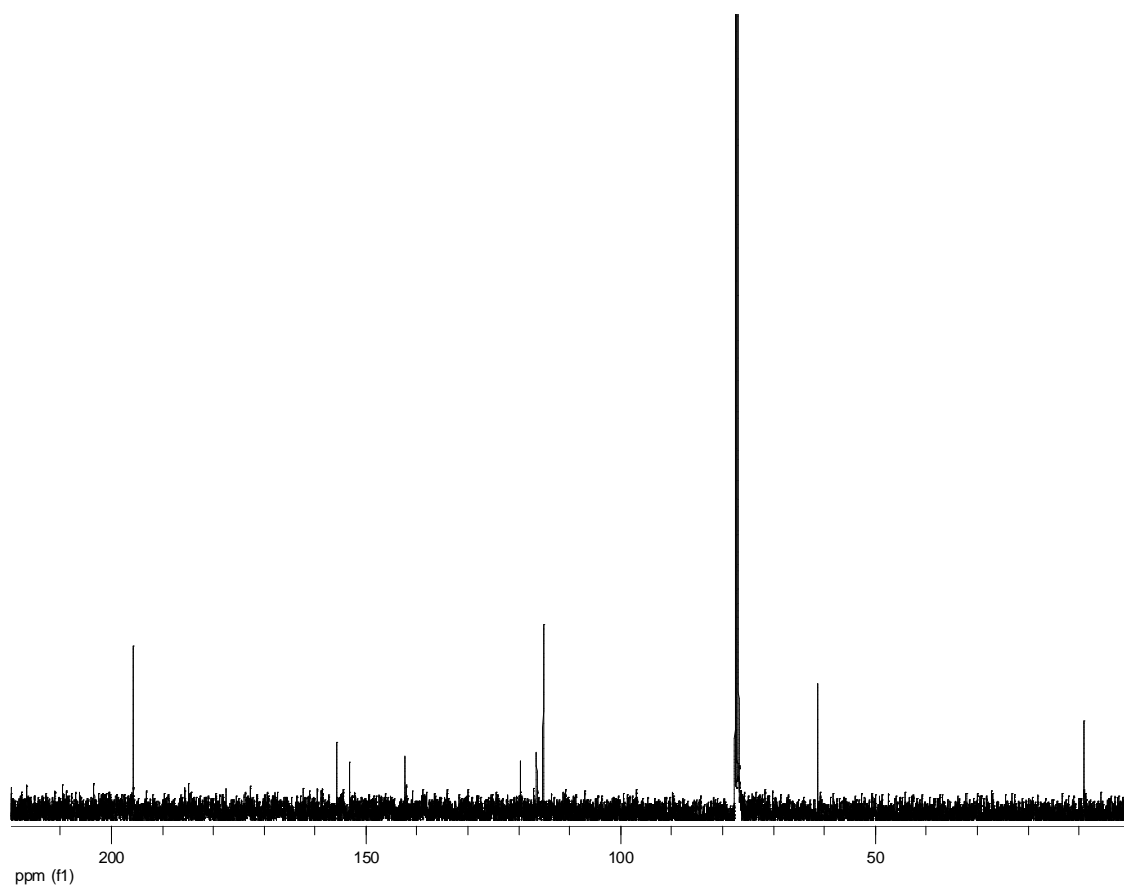

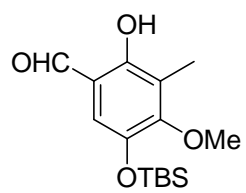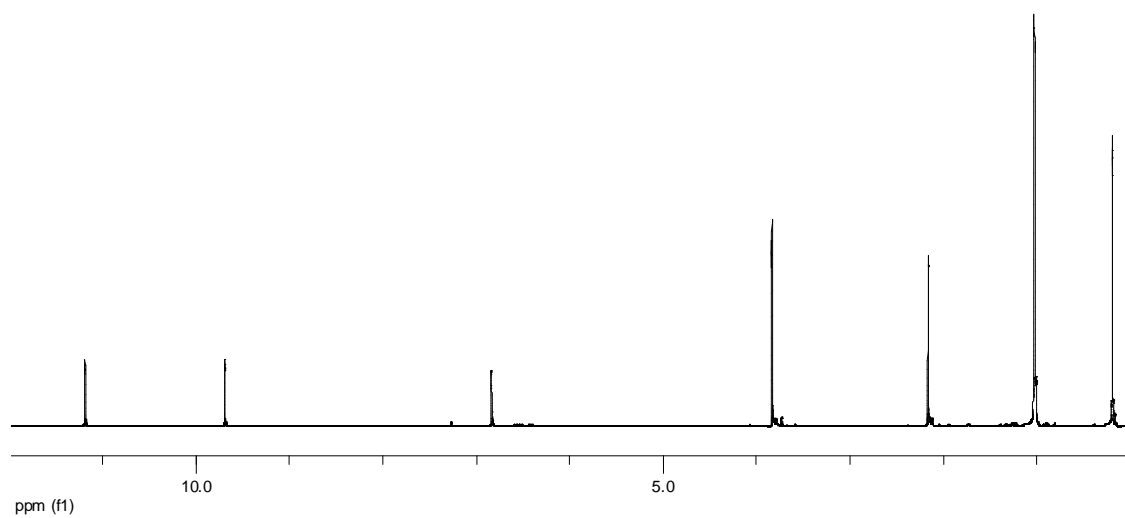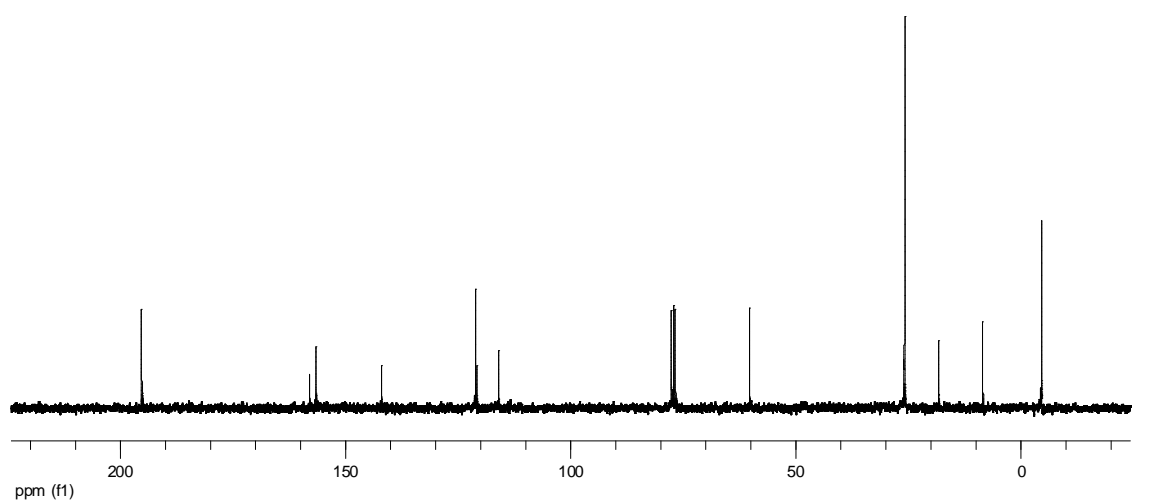

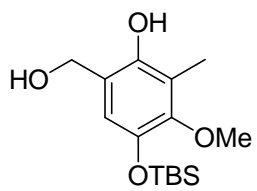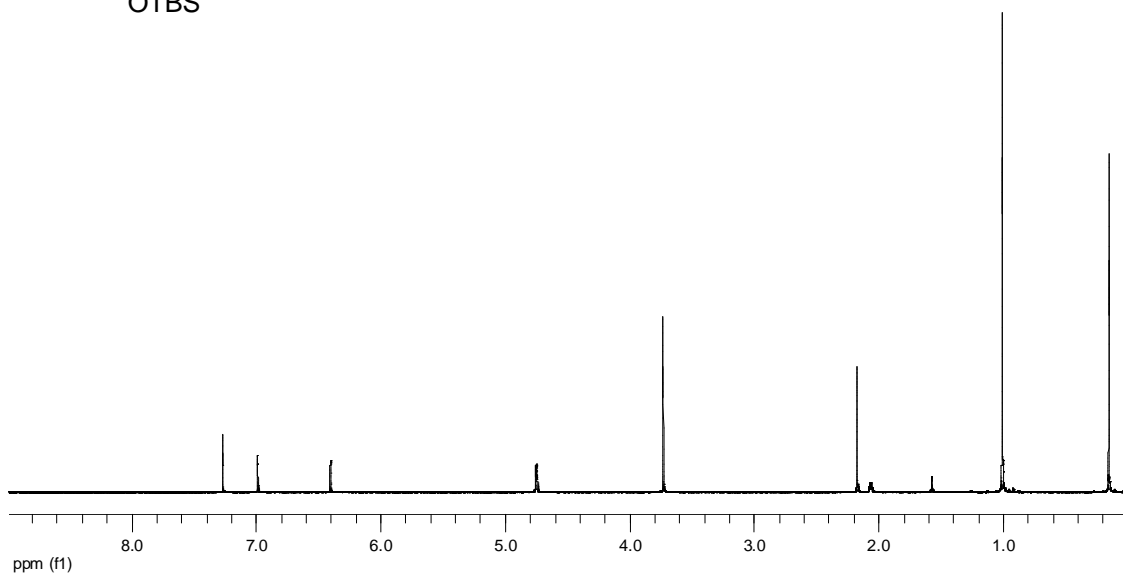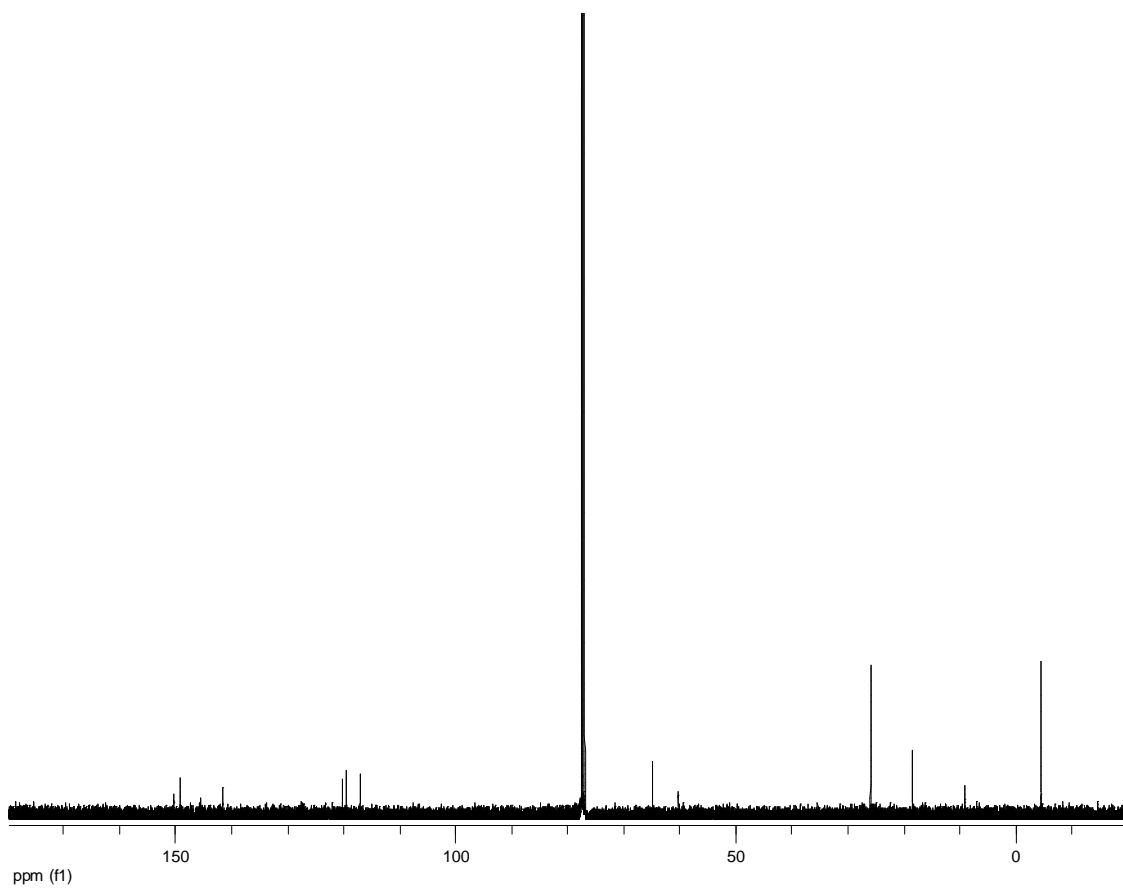

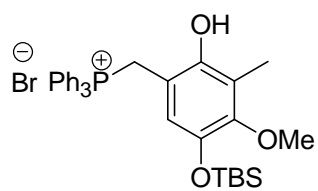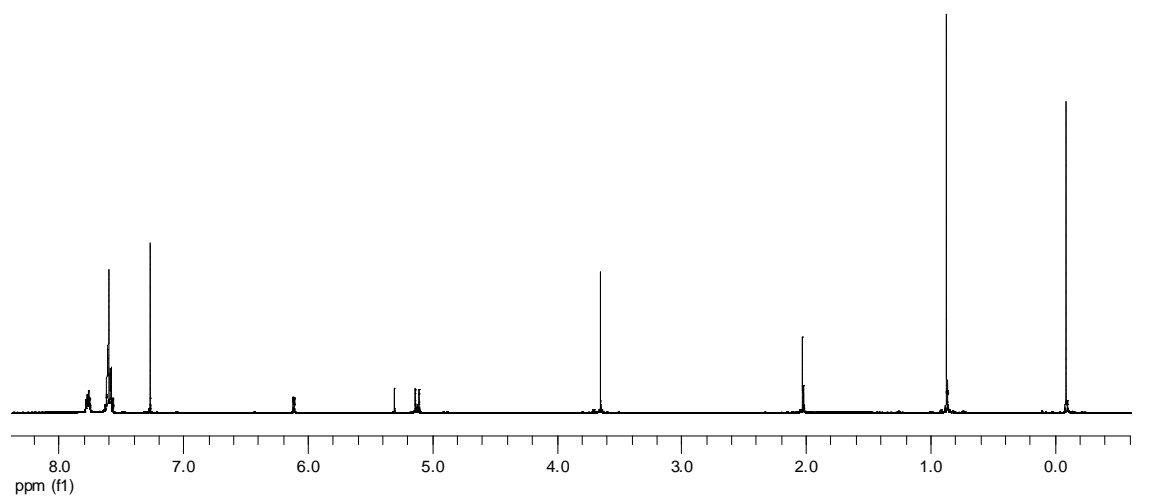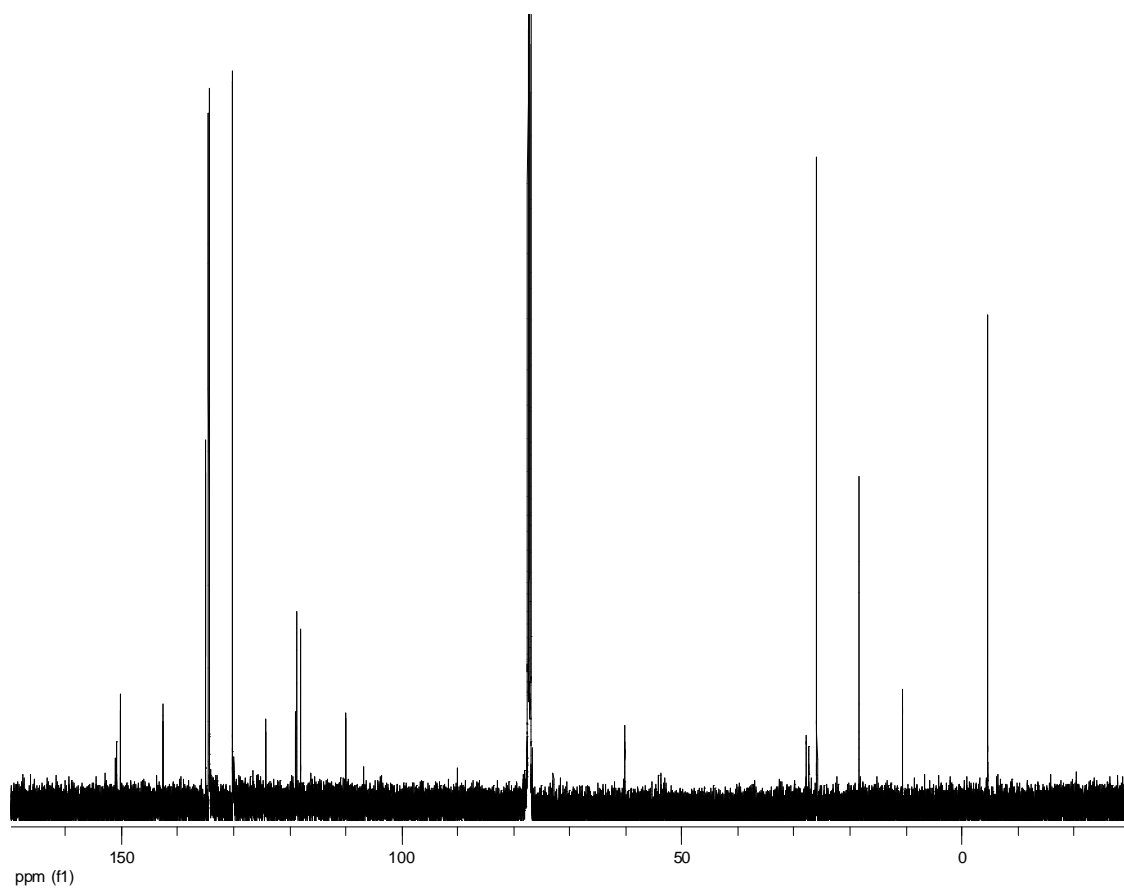

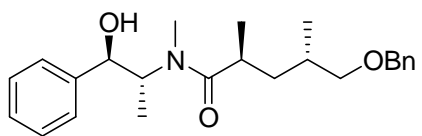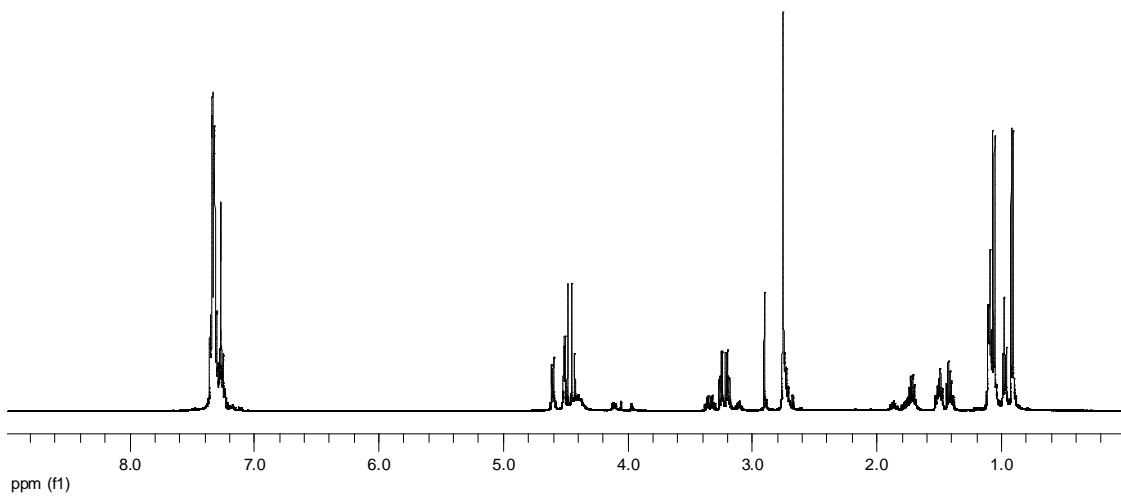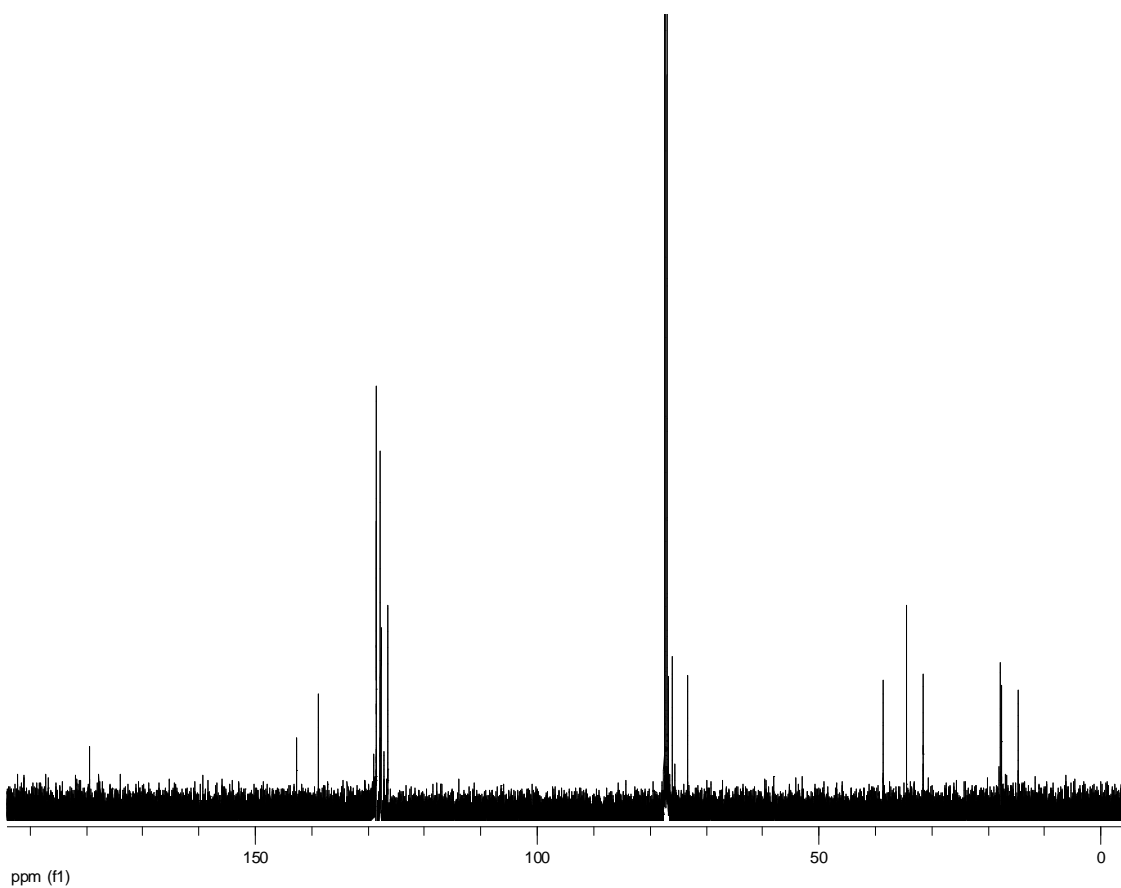

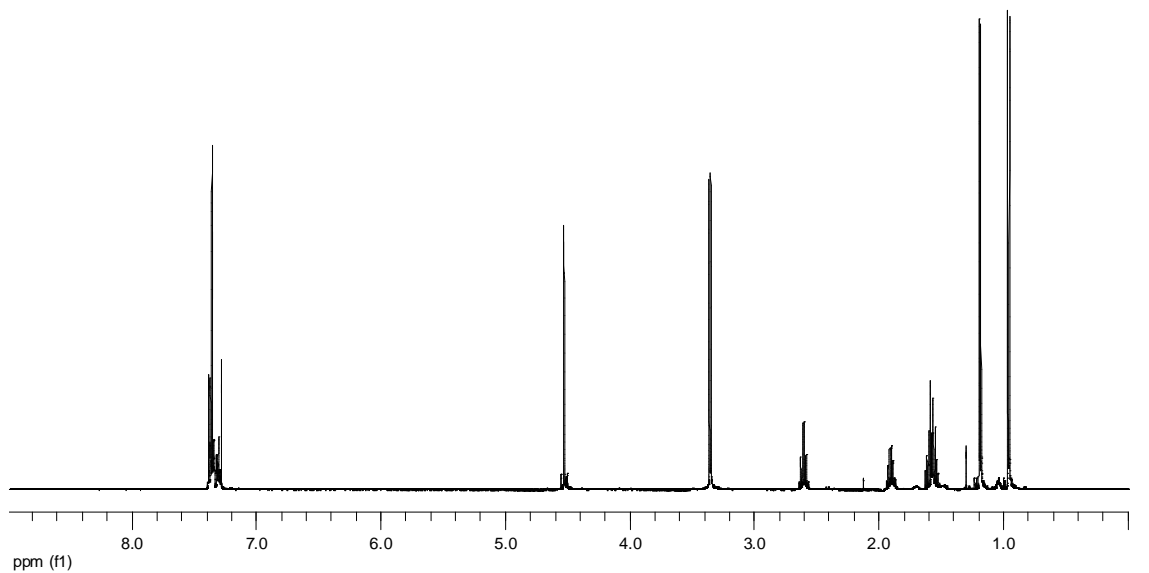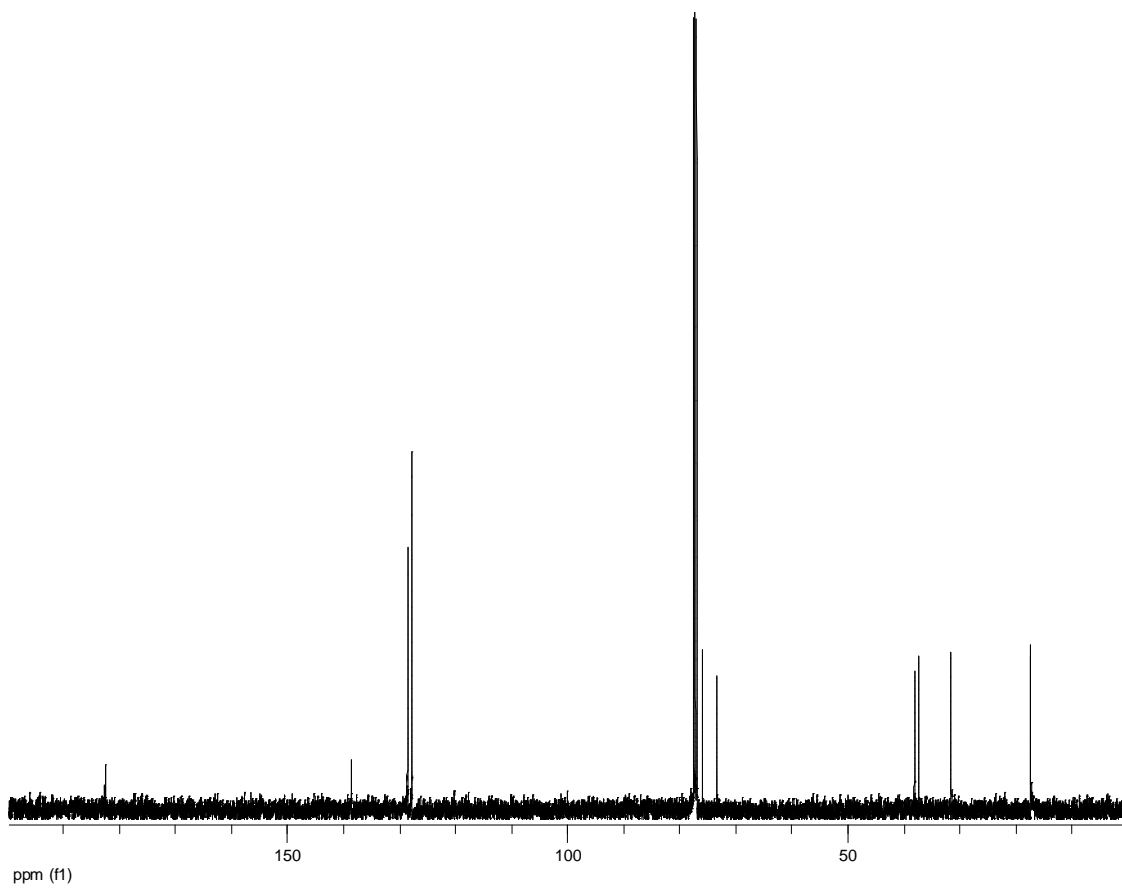

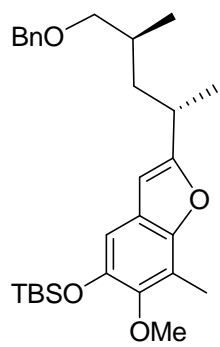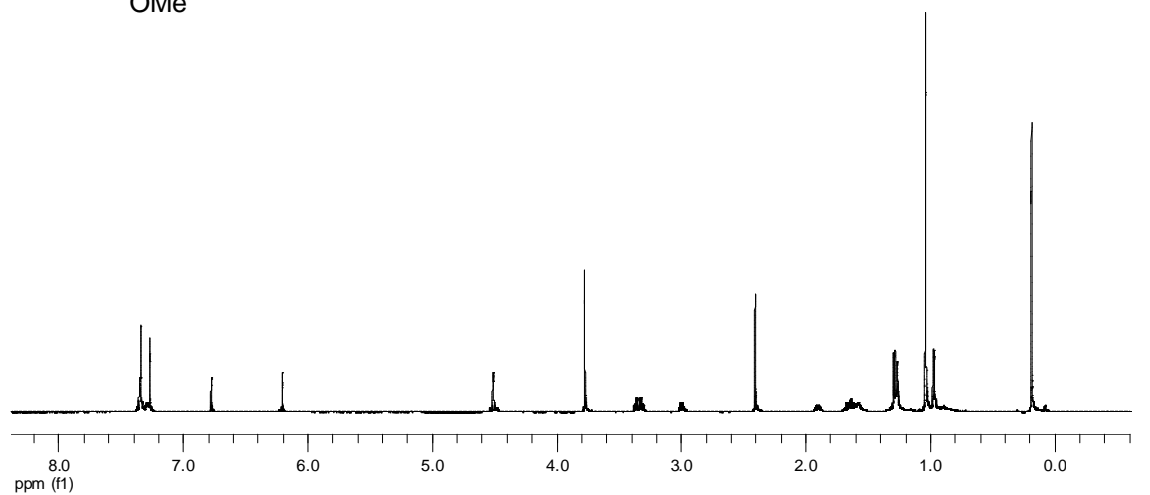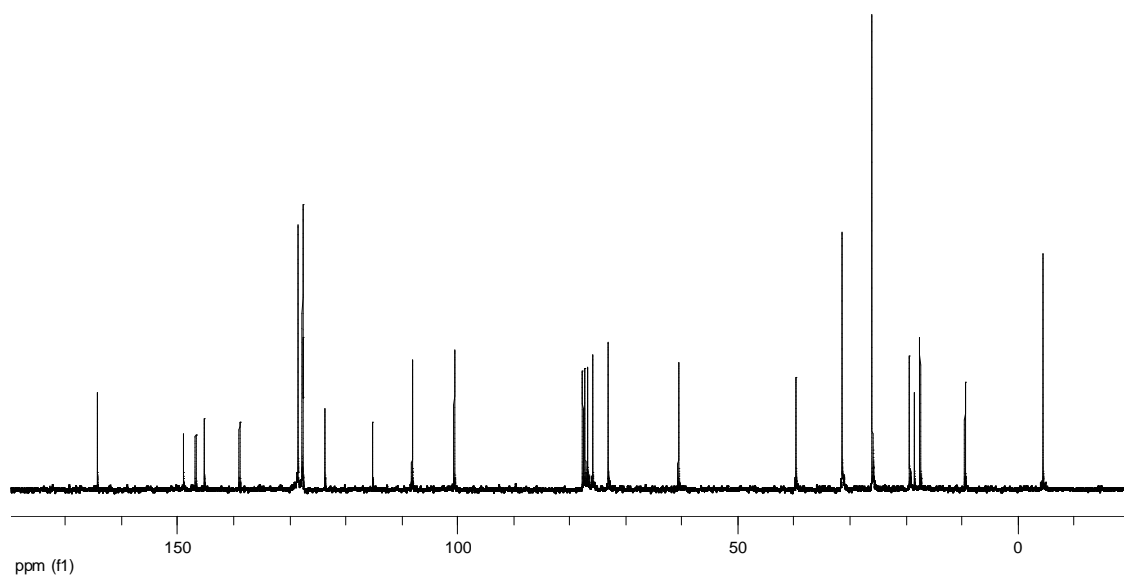

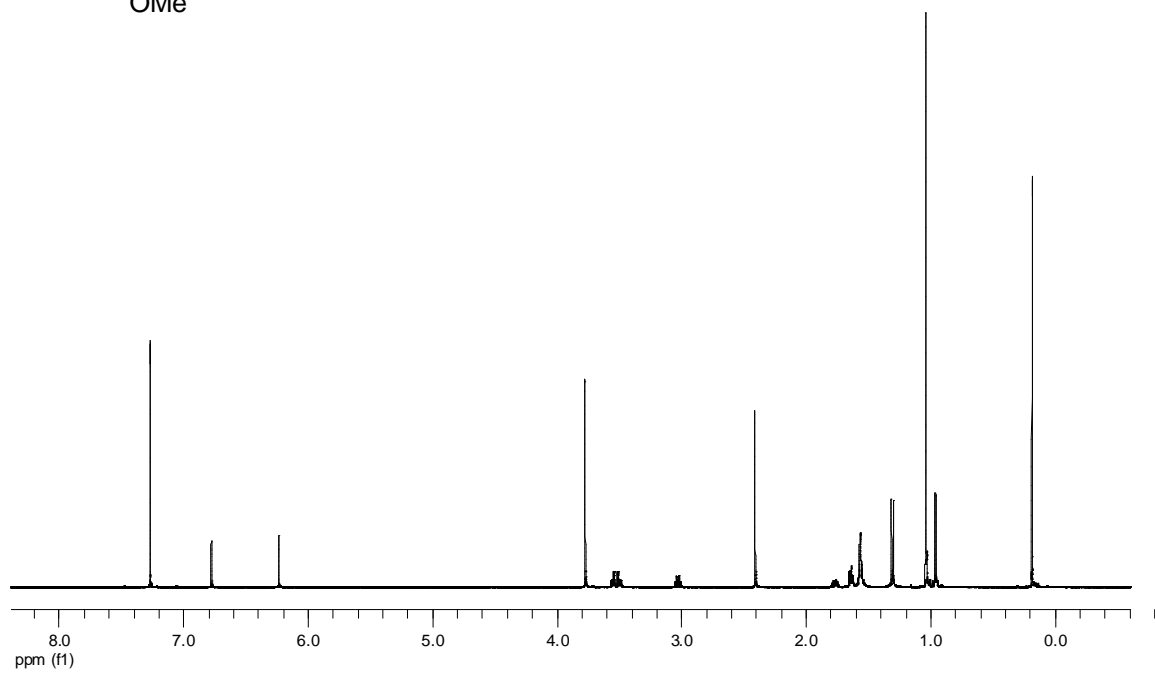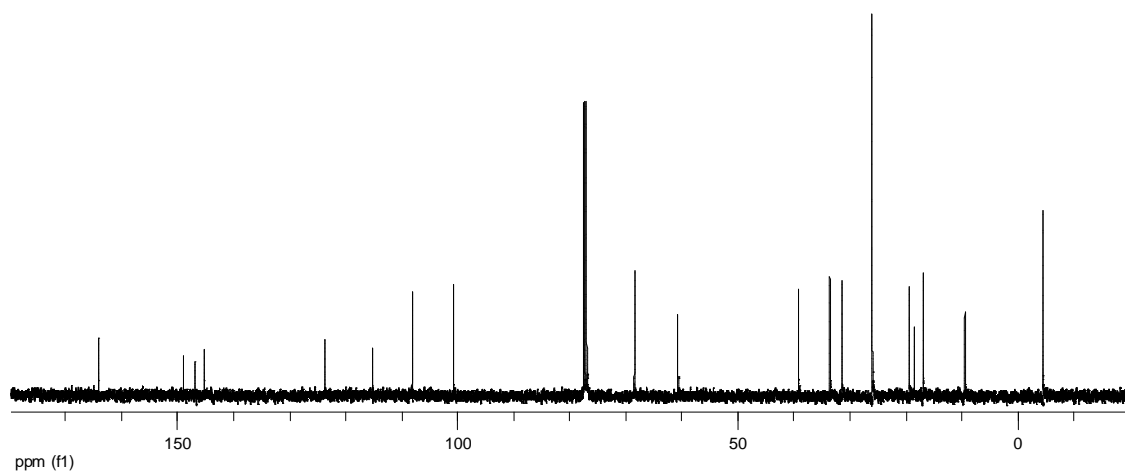

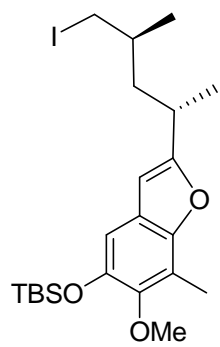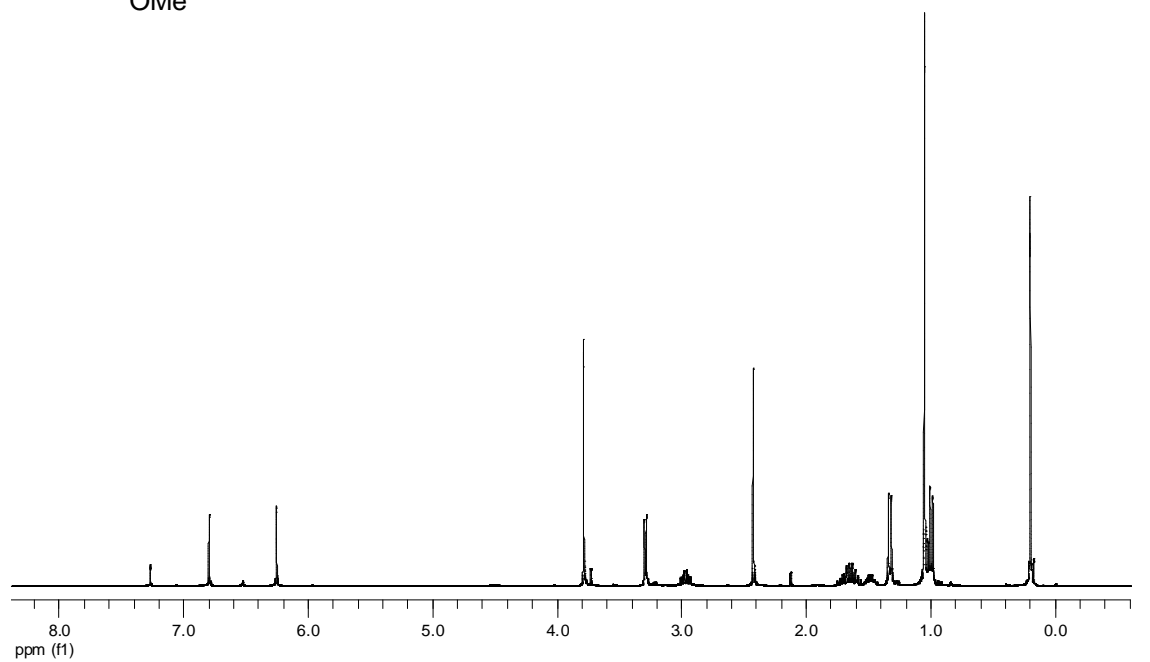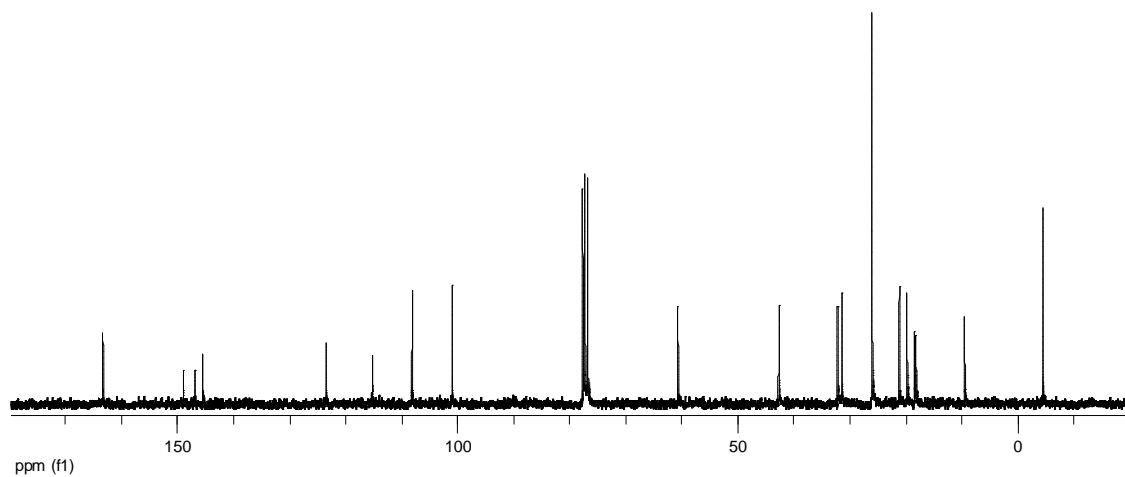

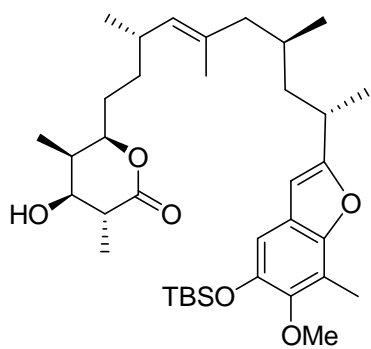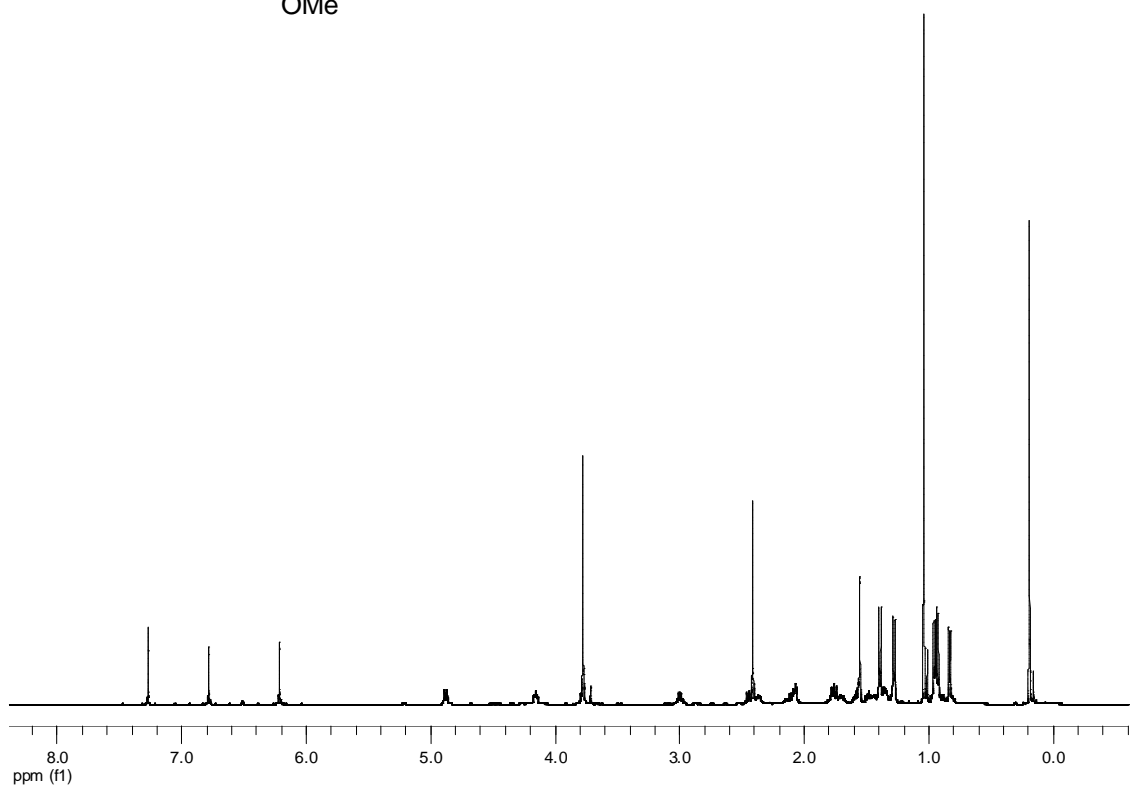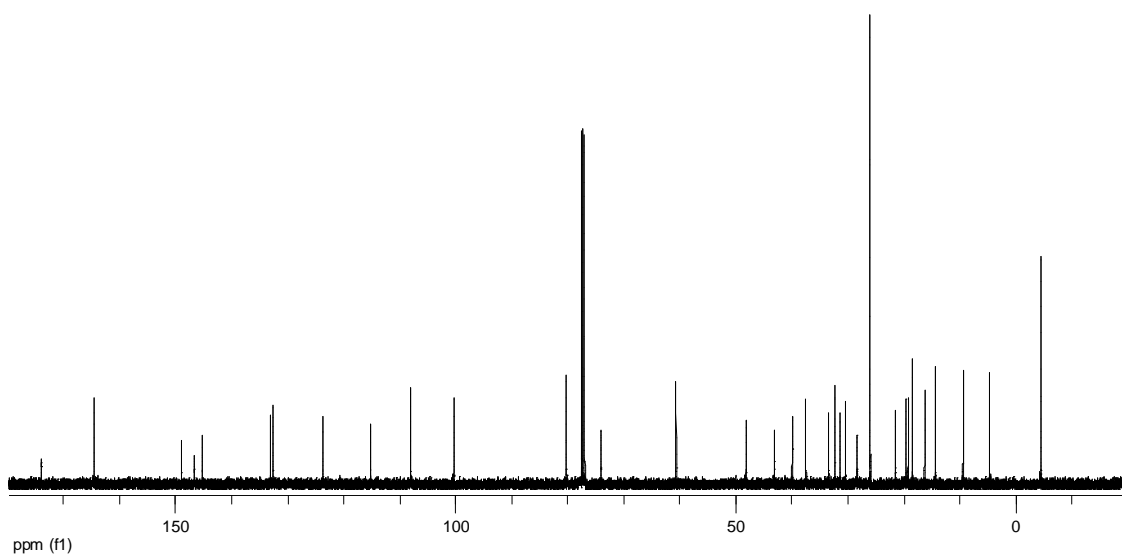

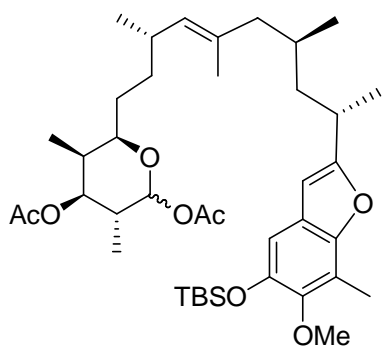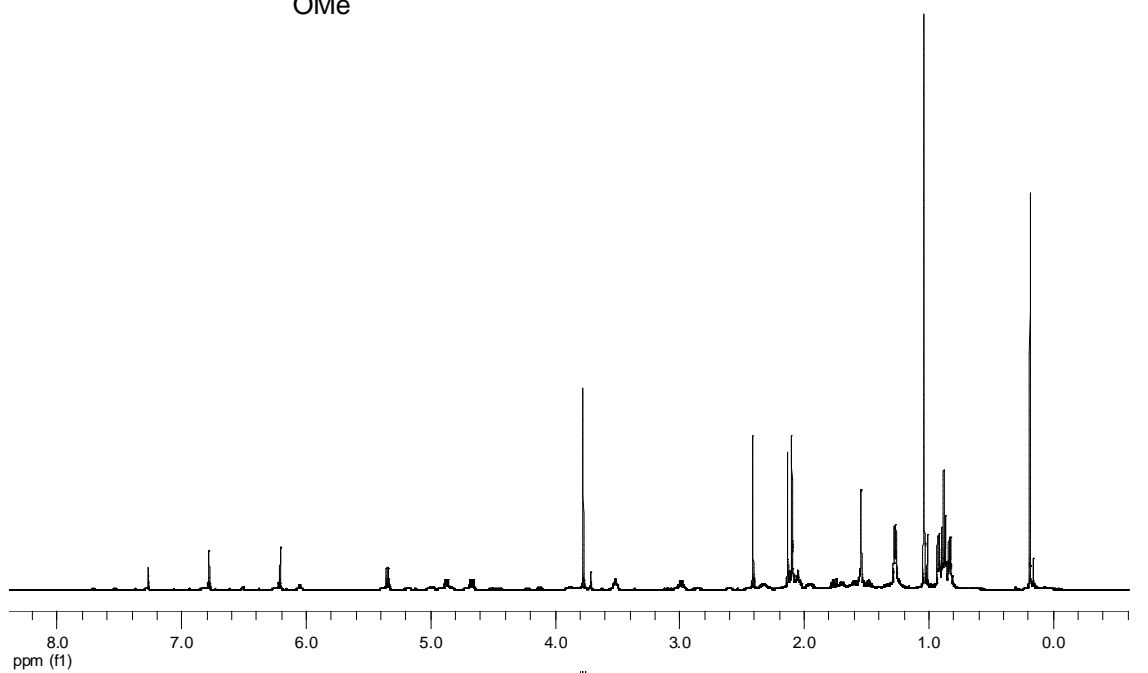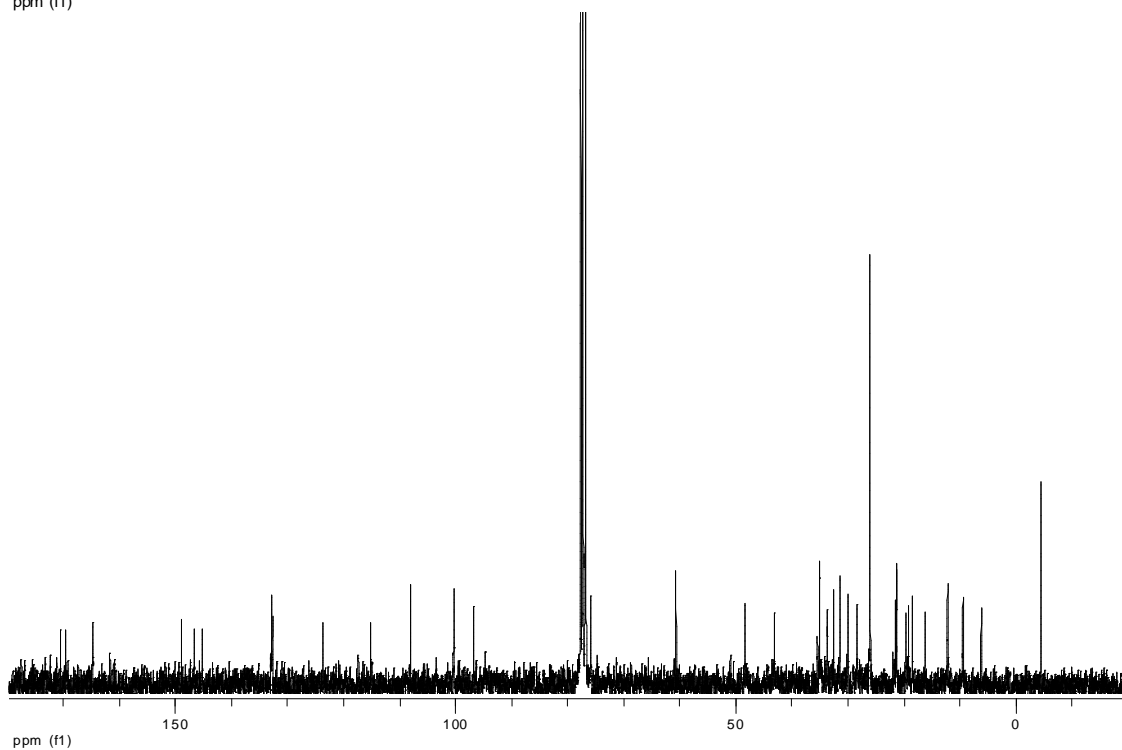

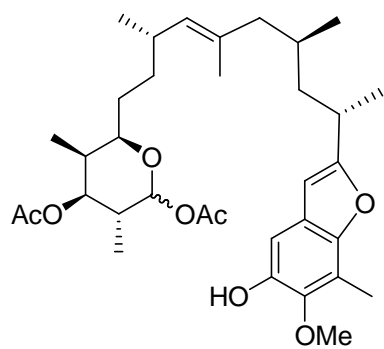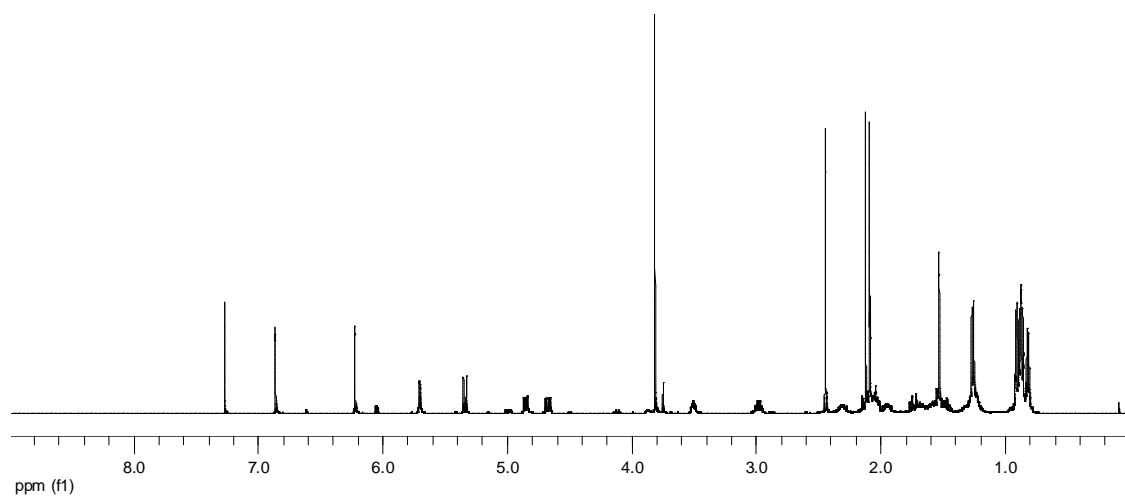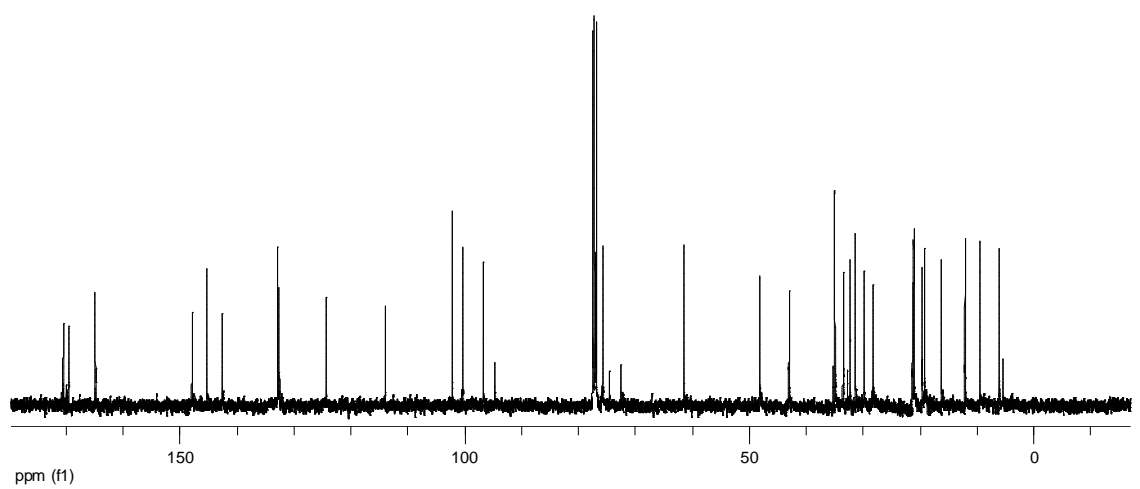

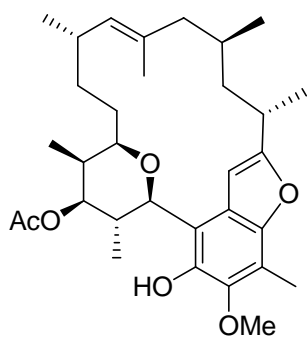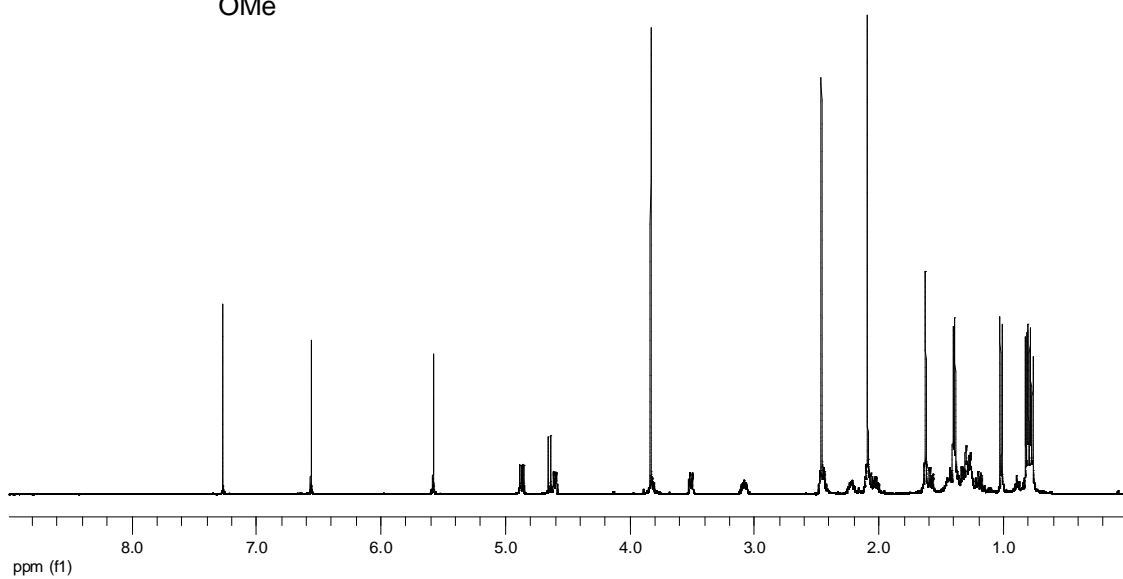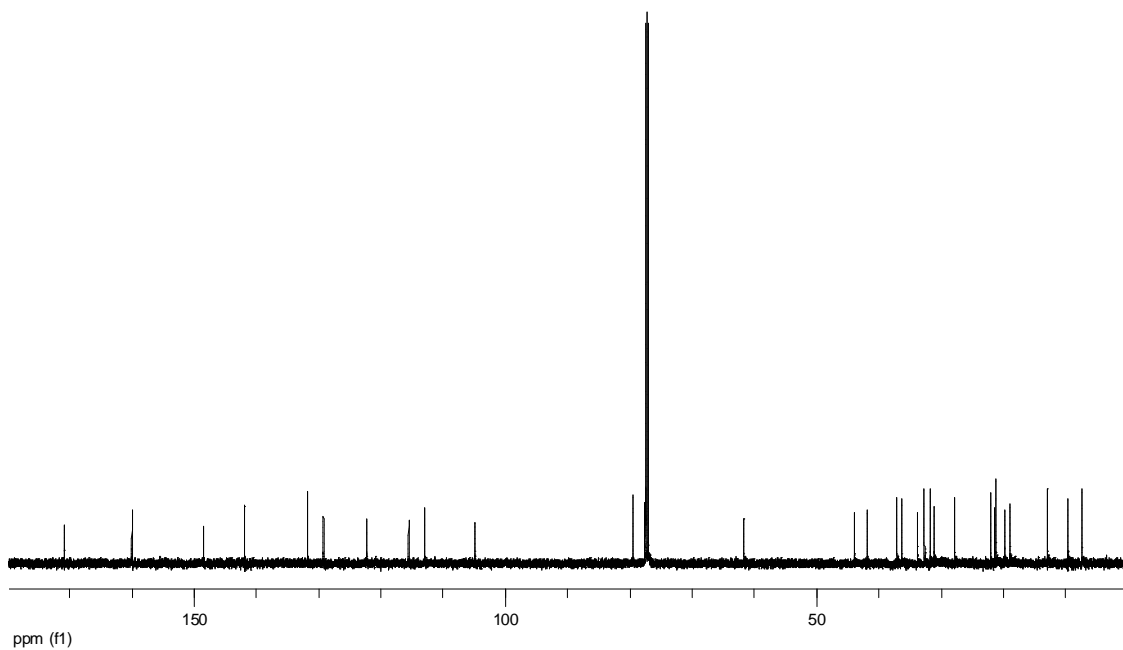

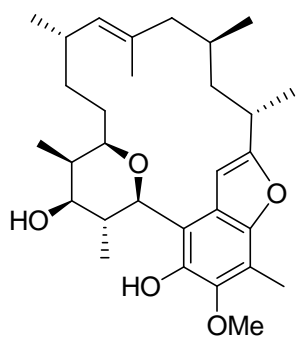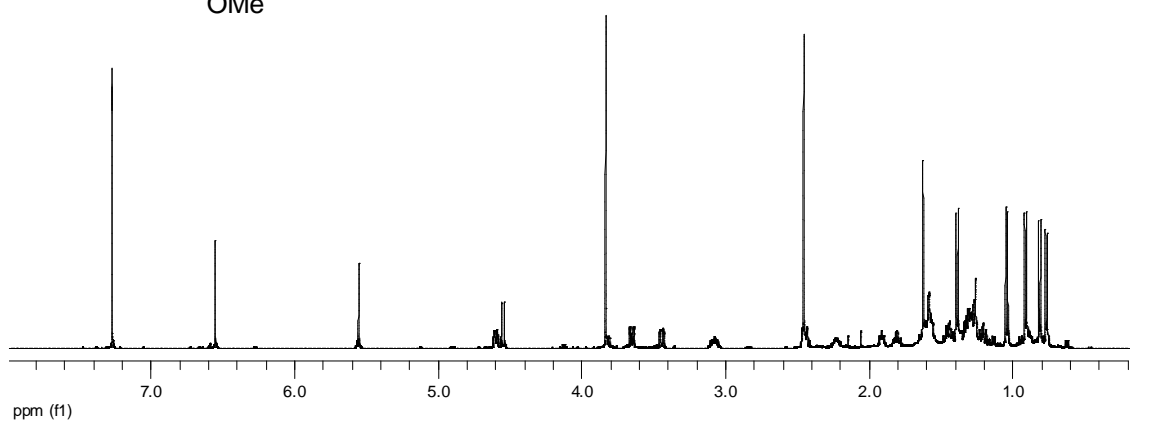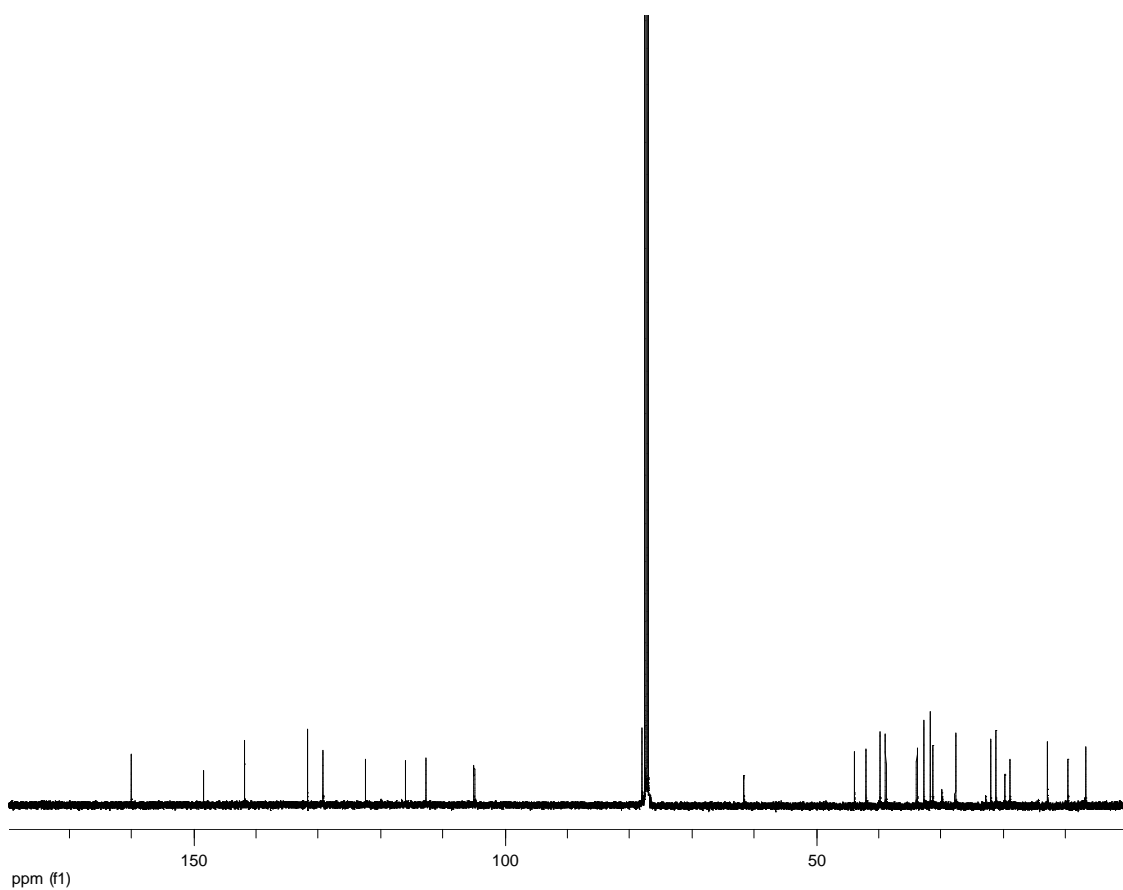

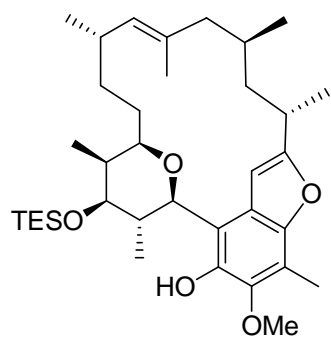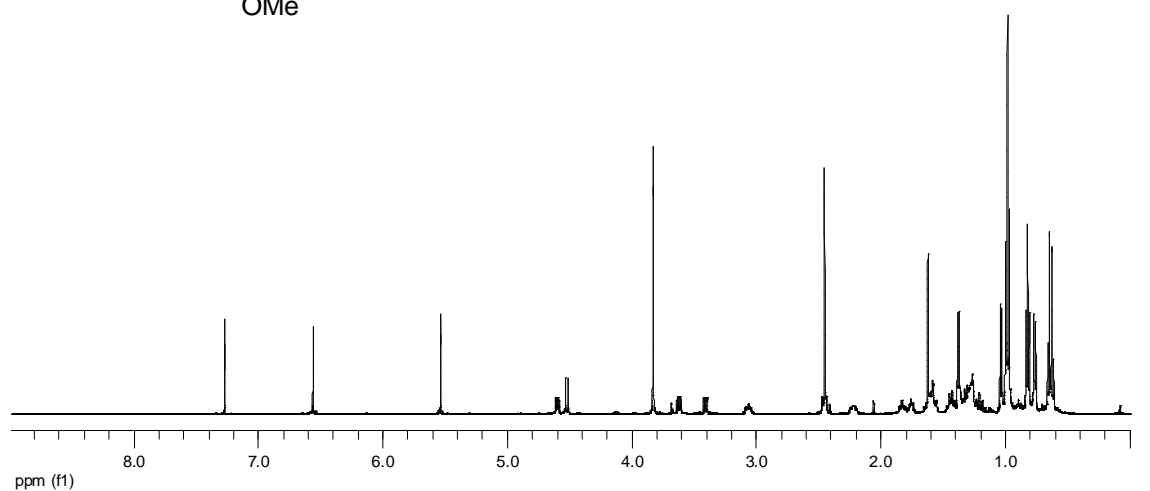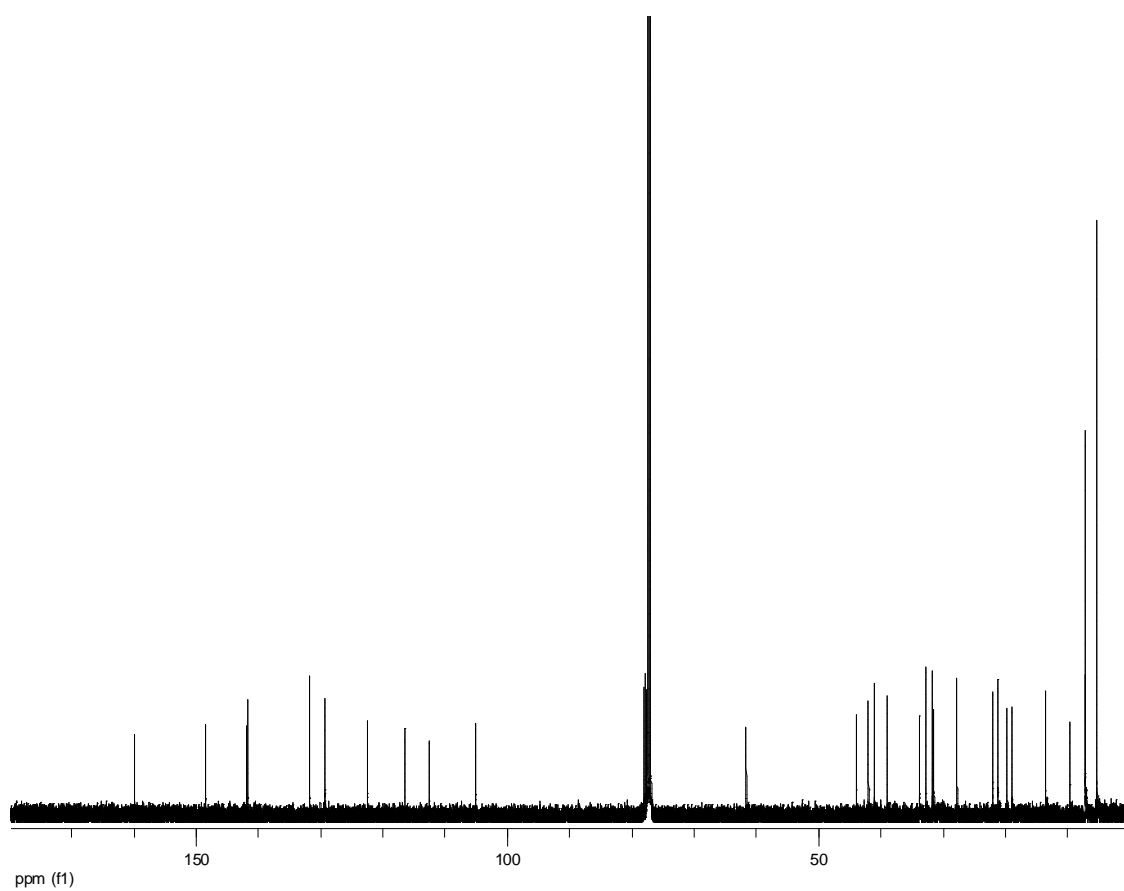

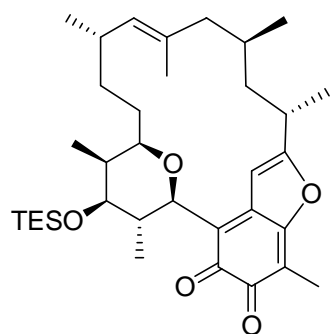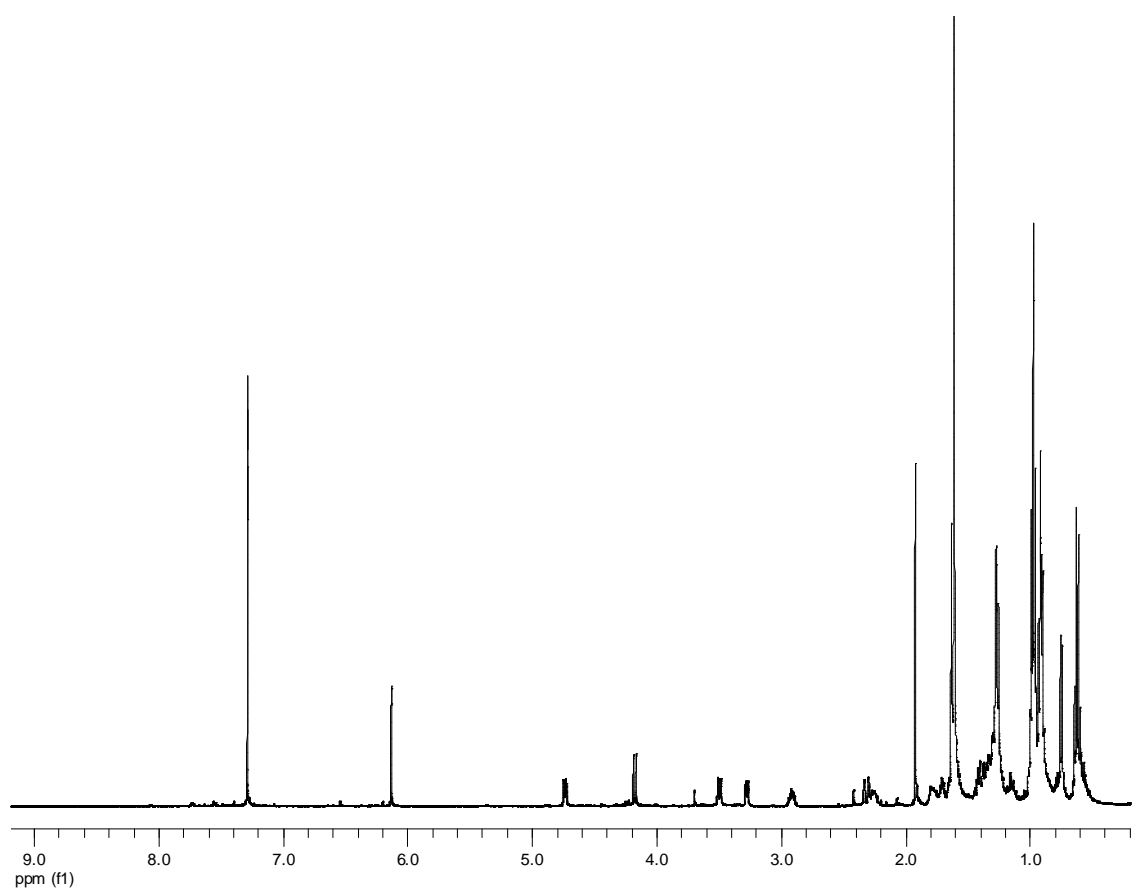

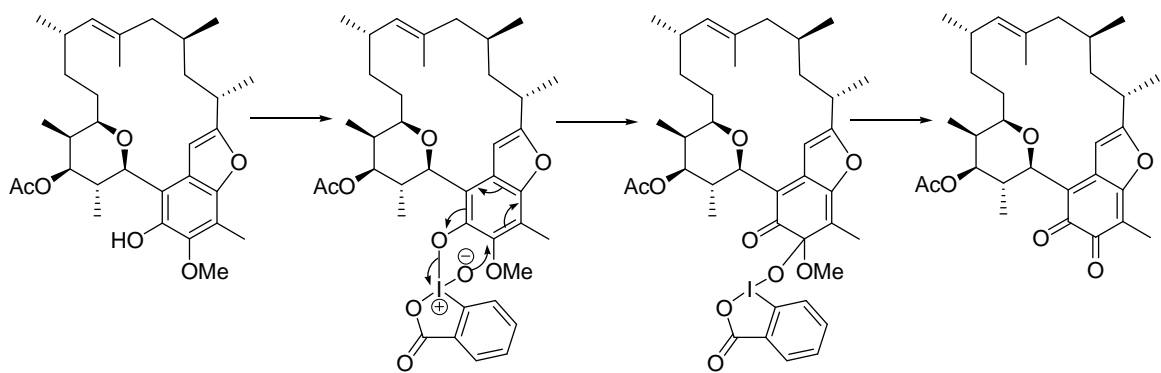

### NMR Study in DMF- $d_7$

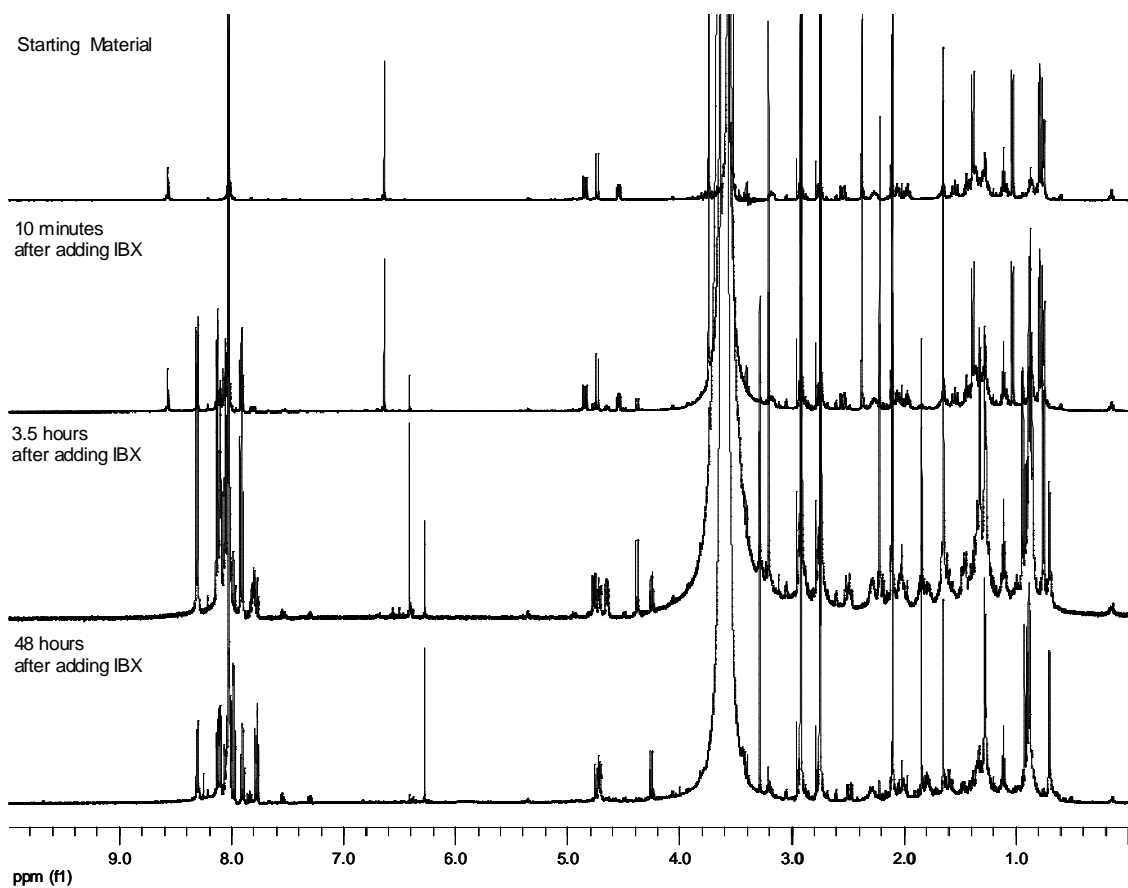

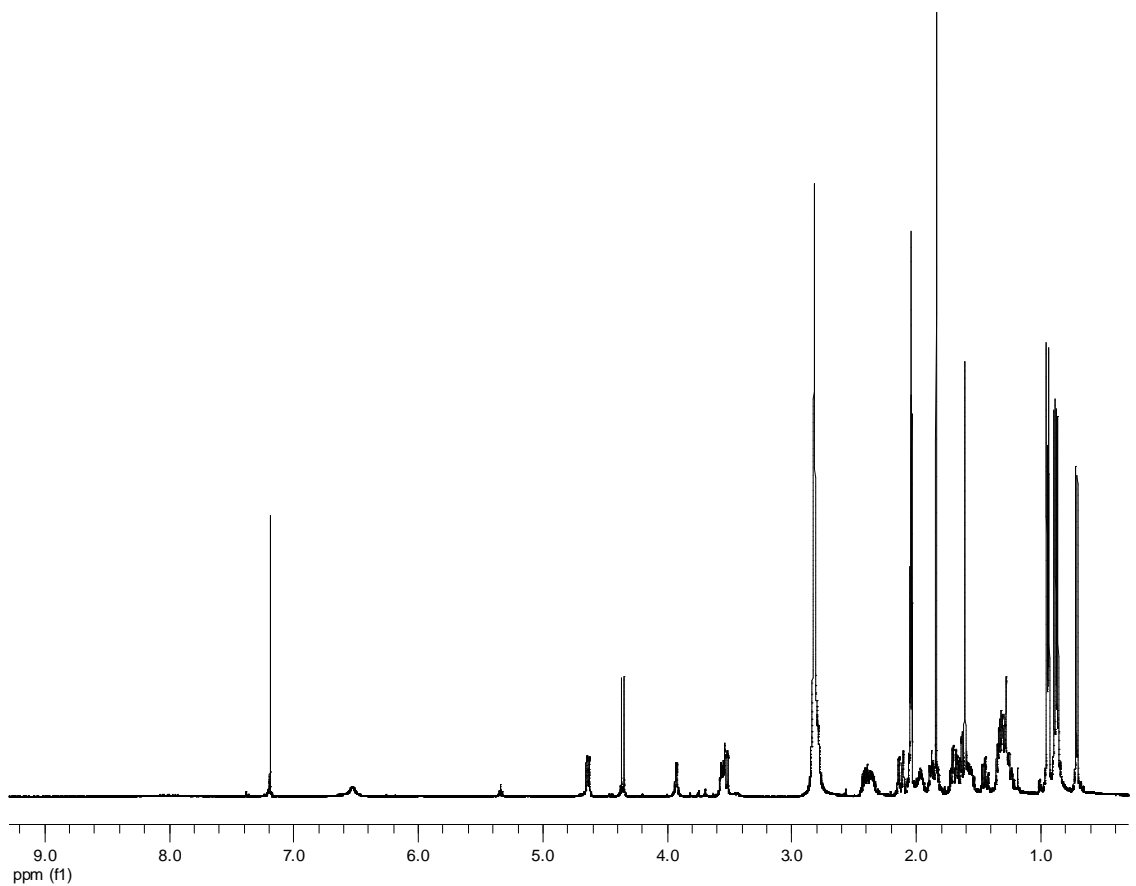

If the sample was azotroped with toluene, the C4 – OH can be seen in  $^1\text{H}$  NMR spectrum (trace amount of toluene remains).

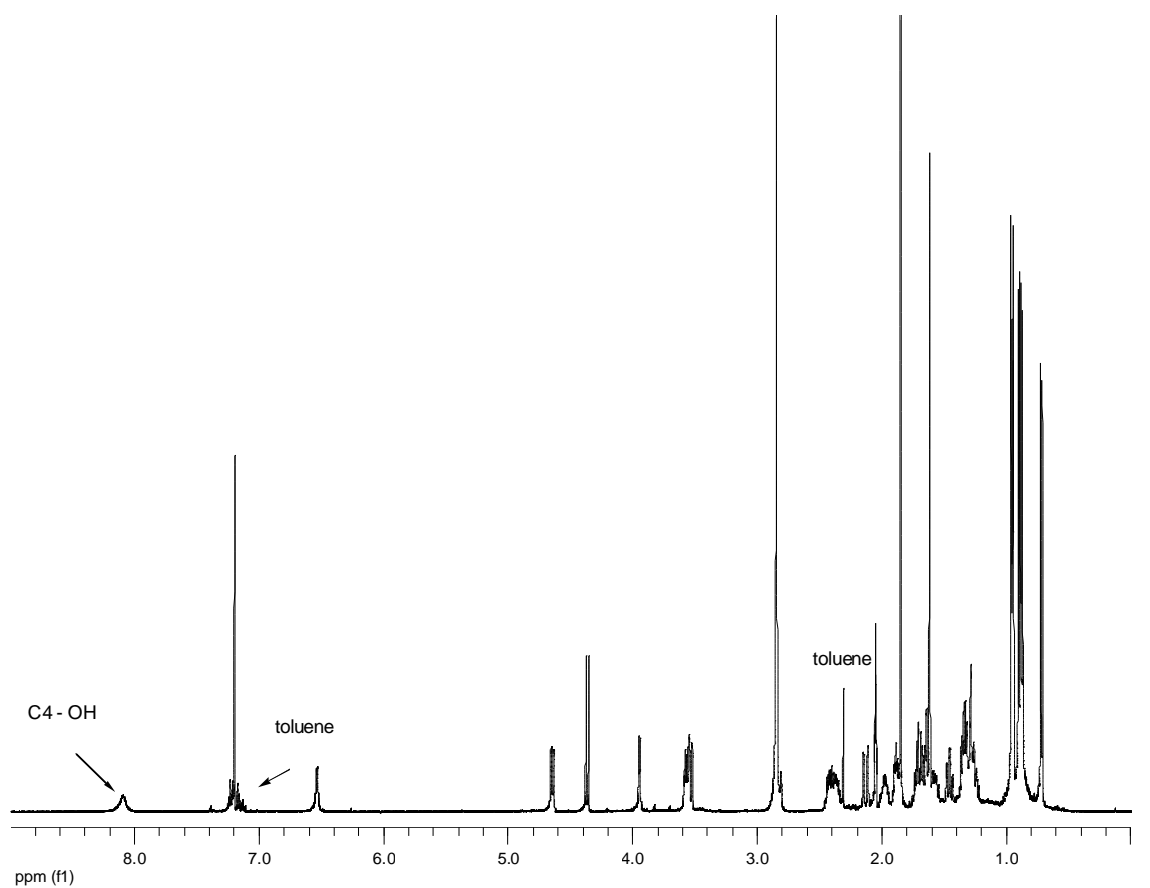

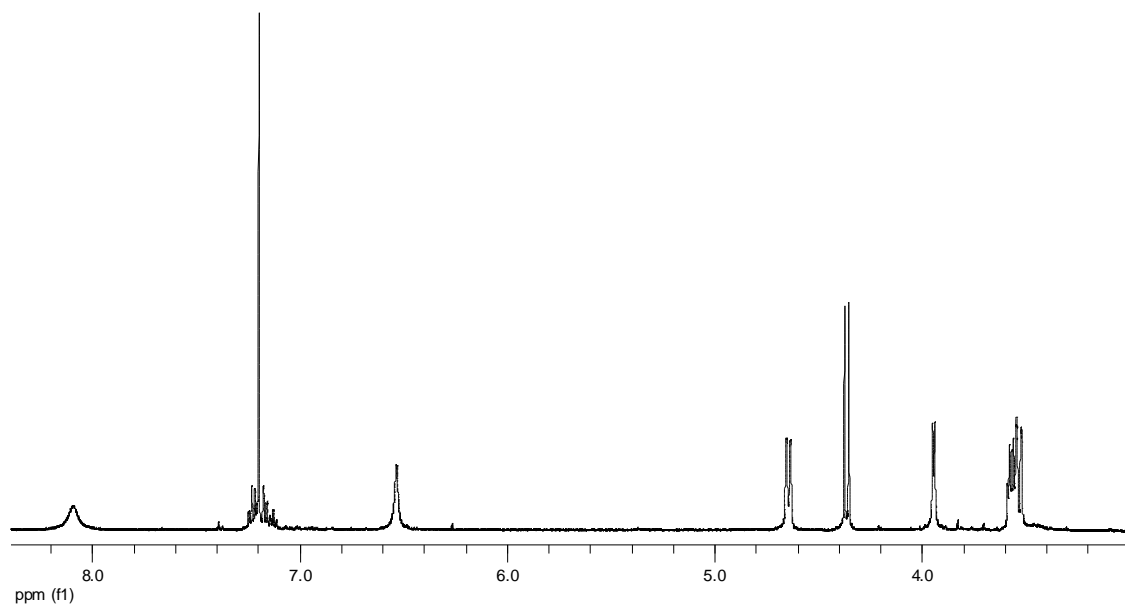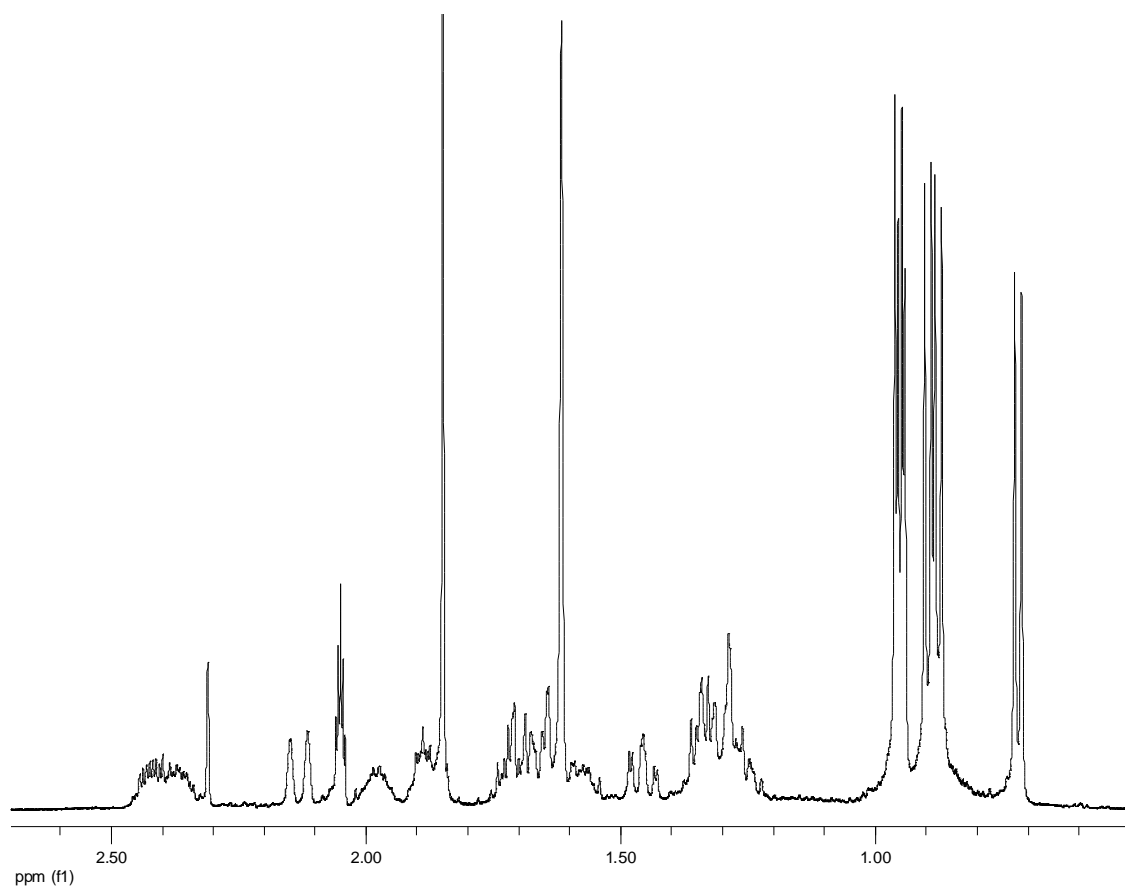

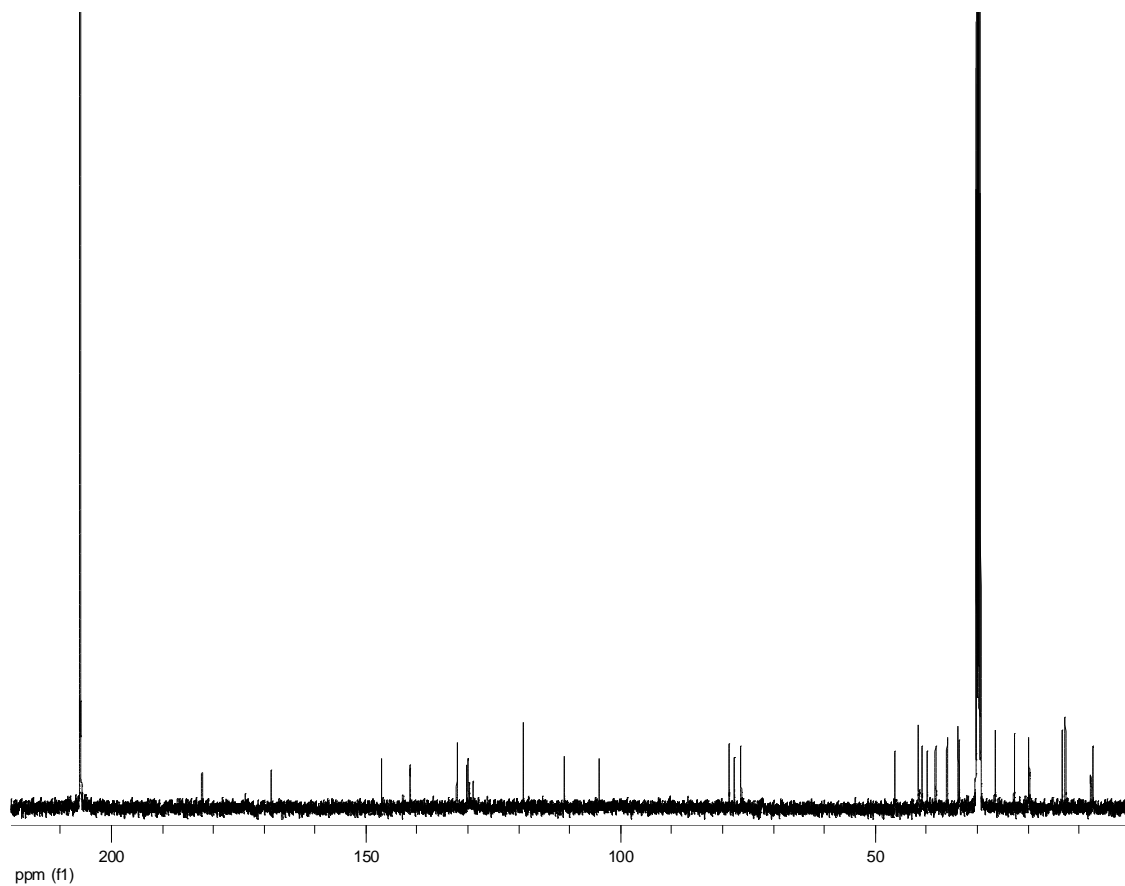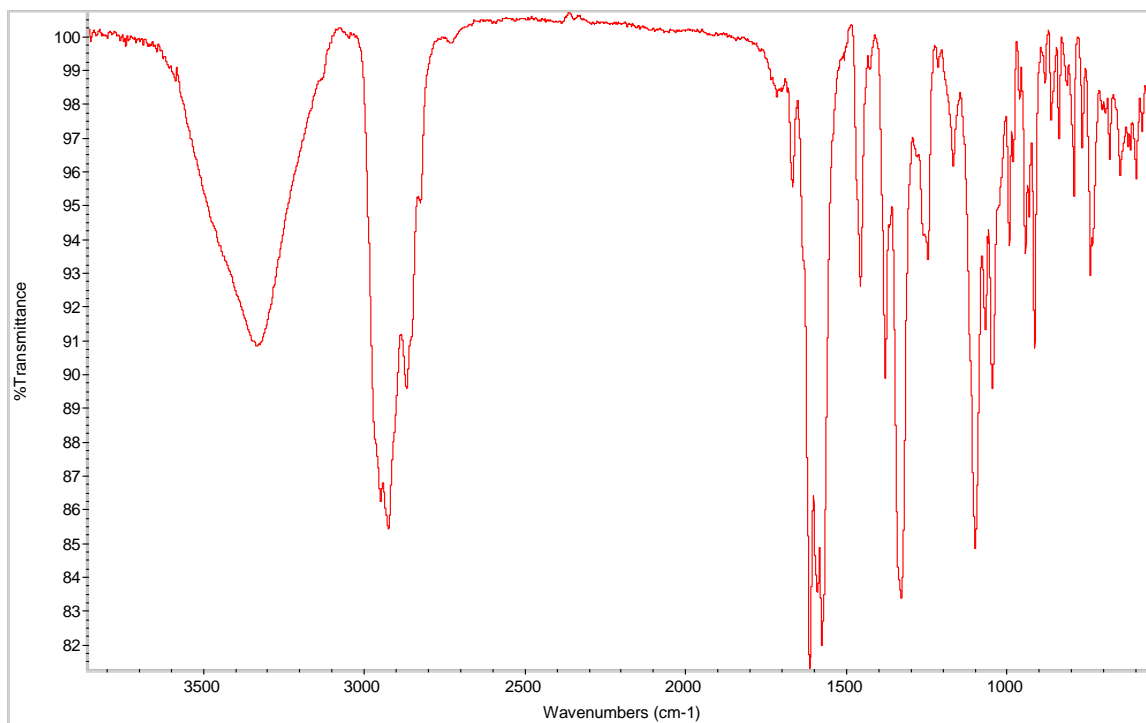

Supplement: NIHMS14959-supplement-S2.pdf [file NIHMS14959-supplement-S2.pdf]
